# Supplementary material for: Tracking spatio-temporal dynamics of early immune responses to an intranasal OMV-based pneumococcal vaccine in mice
Source: Research Square preprint supplement (doi:10.21203/rs.3.rs-7982436/v1), 2025-11-06
Supplement: Supplementary file 1 [file 4e35a32e1ff4b30c623897ad.docx]

**Supplementary data**

**
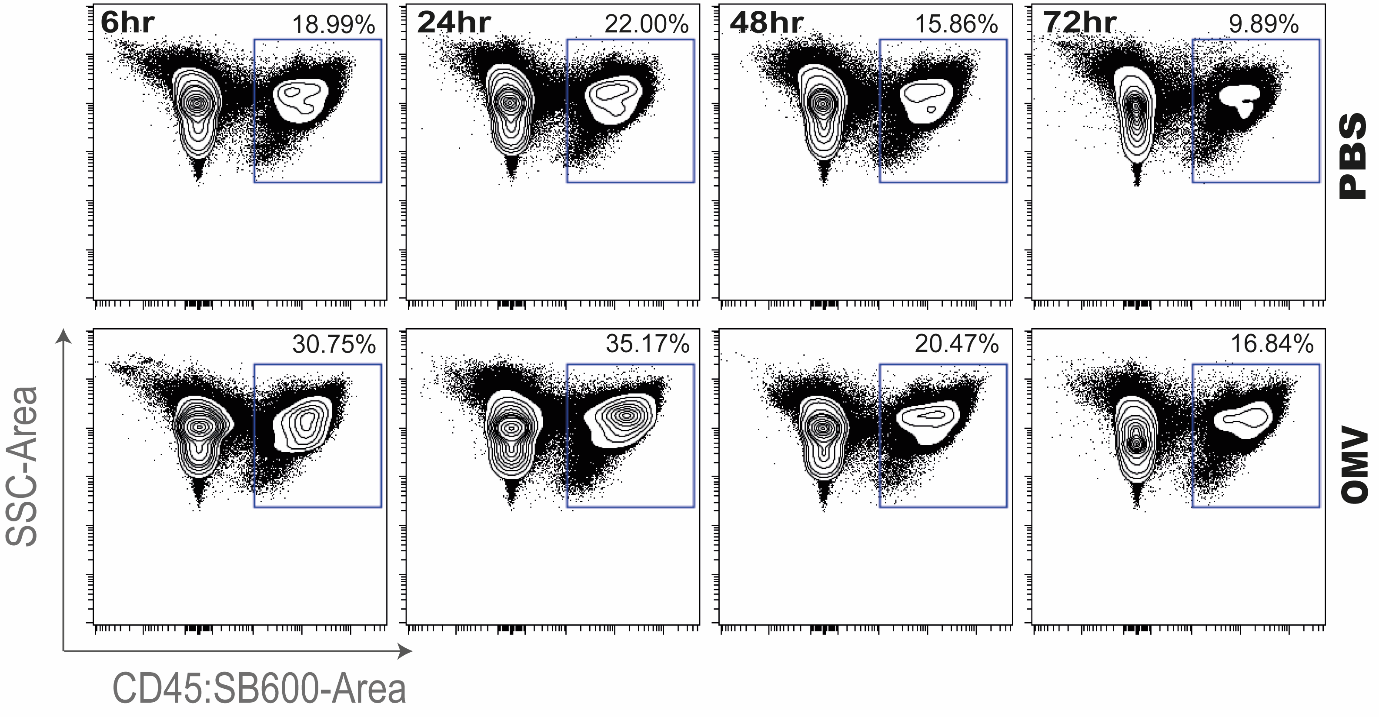
**

**Fig. S1.** Contour plots illustrating the abundance of total immune cells (live CD45⁺) in murine nasal tissue across different time points post-vaccination; plots are concatenates from individual samples, percentages represent the mean of individual samples (n = 5).


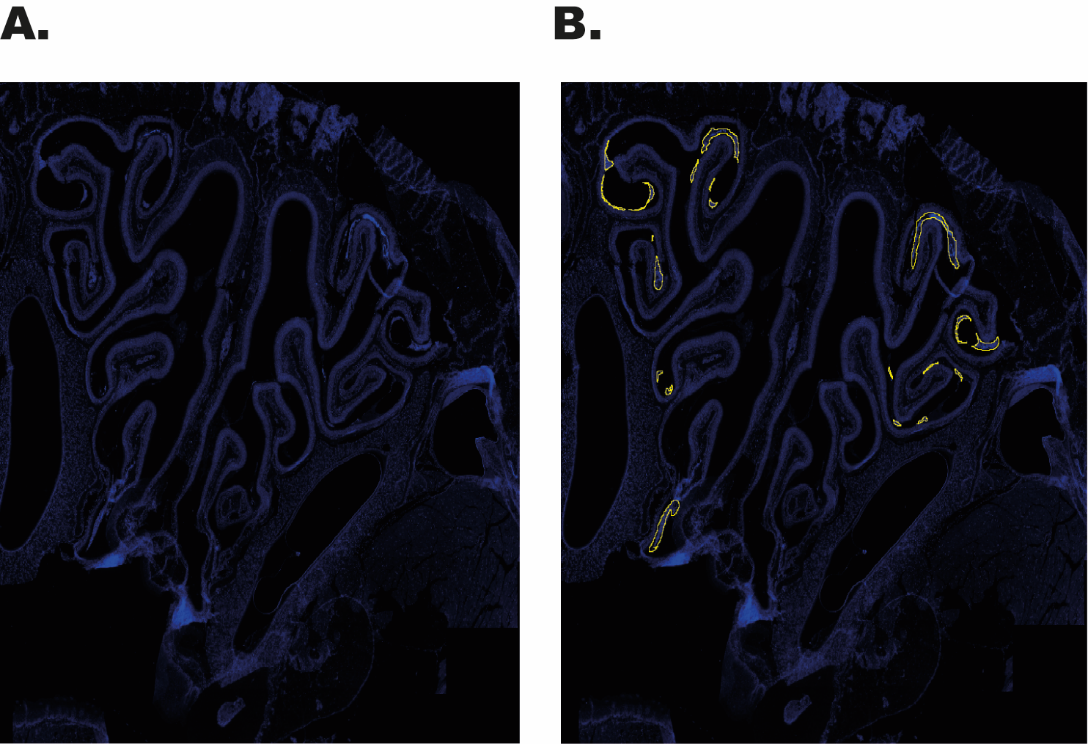


**Fig. S2. Method of ROI selection and quantification in nasal tissue sections.** Representative image illustrating the approach for region of interest (ROI) selection and area quantification using FIJI. Regions corresponding to DAPI-positive cells within the nasal turbinates and passages were marked (yellow) as ROIs, and their total area was quantified to assess cellular influx.


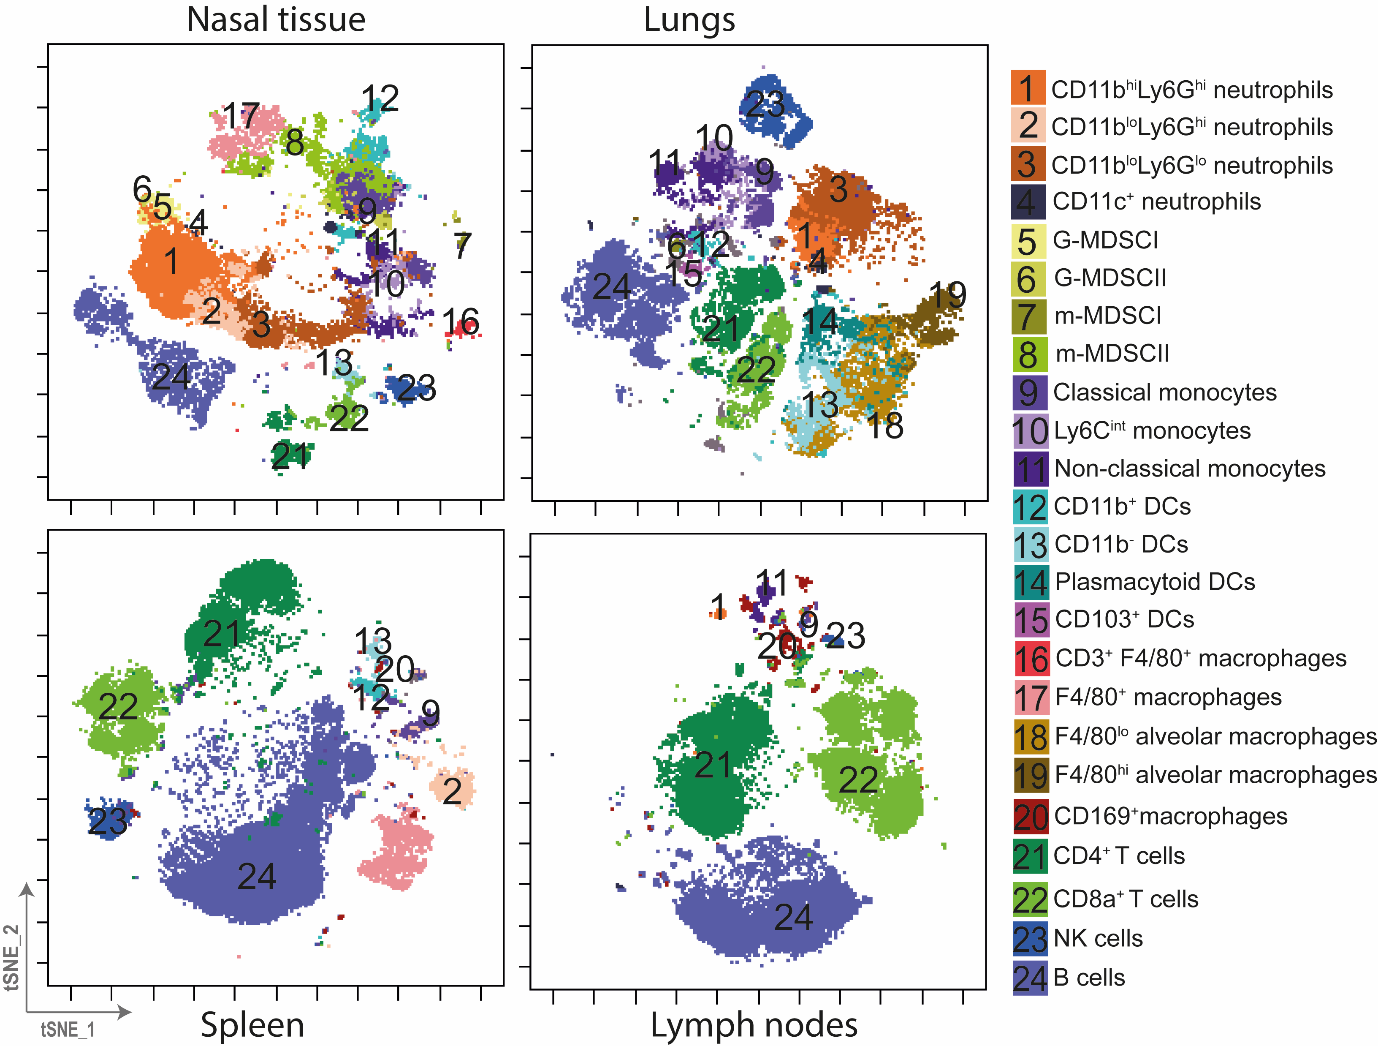


**Fig S3:** **Representative t-SNE plots showing key immune phenotypes across murine tissues.** t-SNE plots depict the major phenotypes identified in nasal tissue, lungs, spleen, and draining lymph nodes following OMV vaccination. Phenotypes were determined by applying FlowSOM clustering analysis to live CD45⁺ immune cells within each tissue.

.


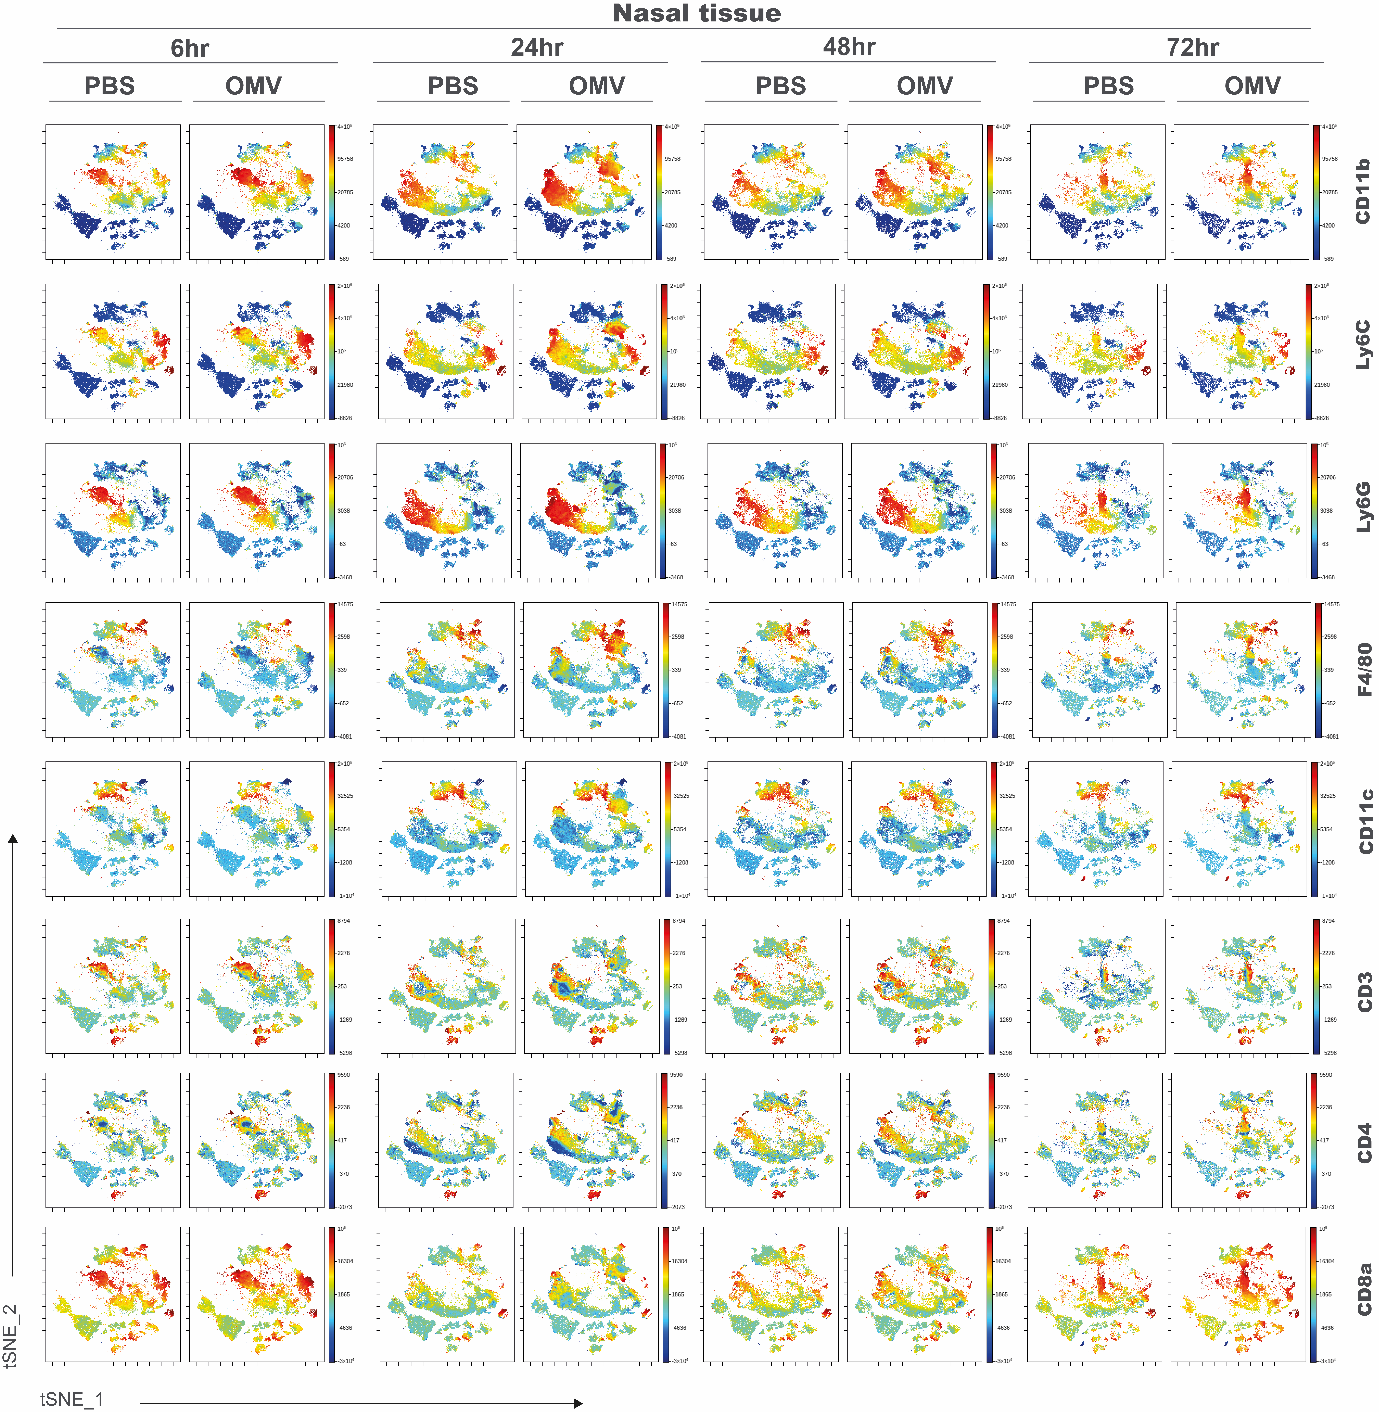


**Fig S4: t-SNE plots showing marker expression patterns in nasal tissue.** t-SNE plots depict the expression profiles of key markers in nasal tissue following OMV vaccination. Plots are concatenated from individual samples (n=5) for each time point and condition. Each marker is displayed with its own independent color scale to indicate relative expression intensity.


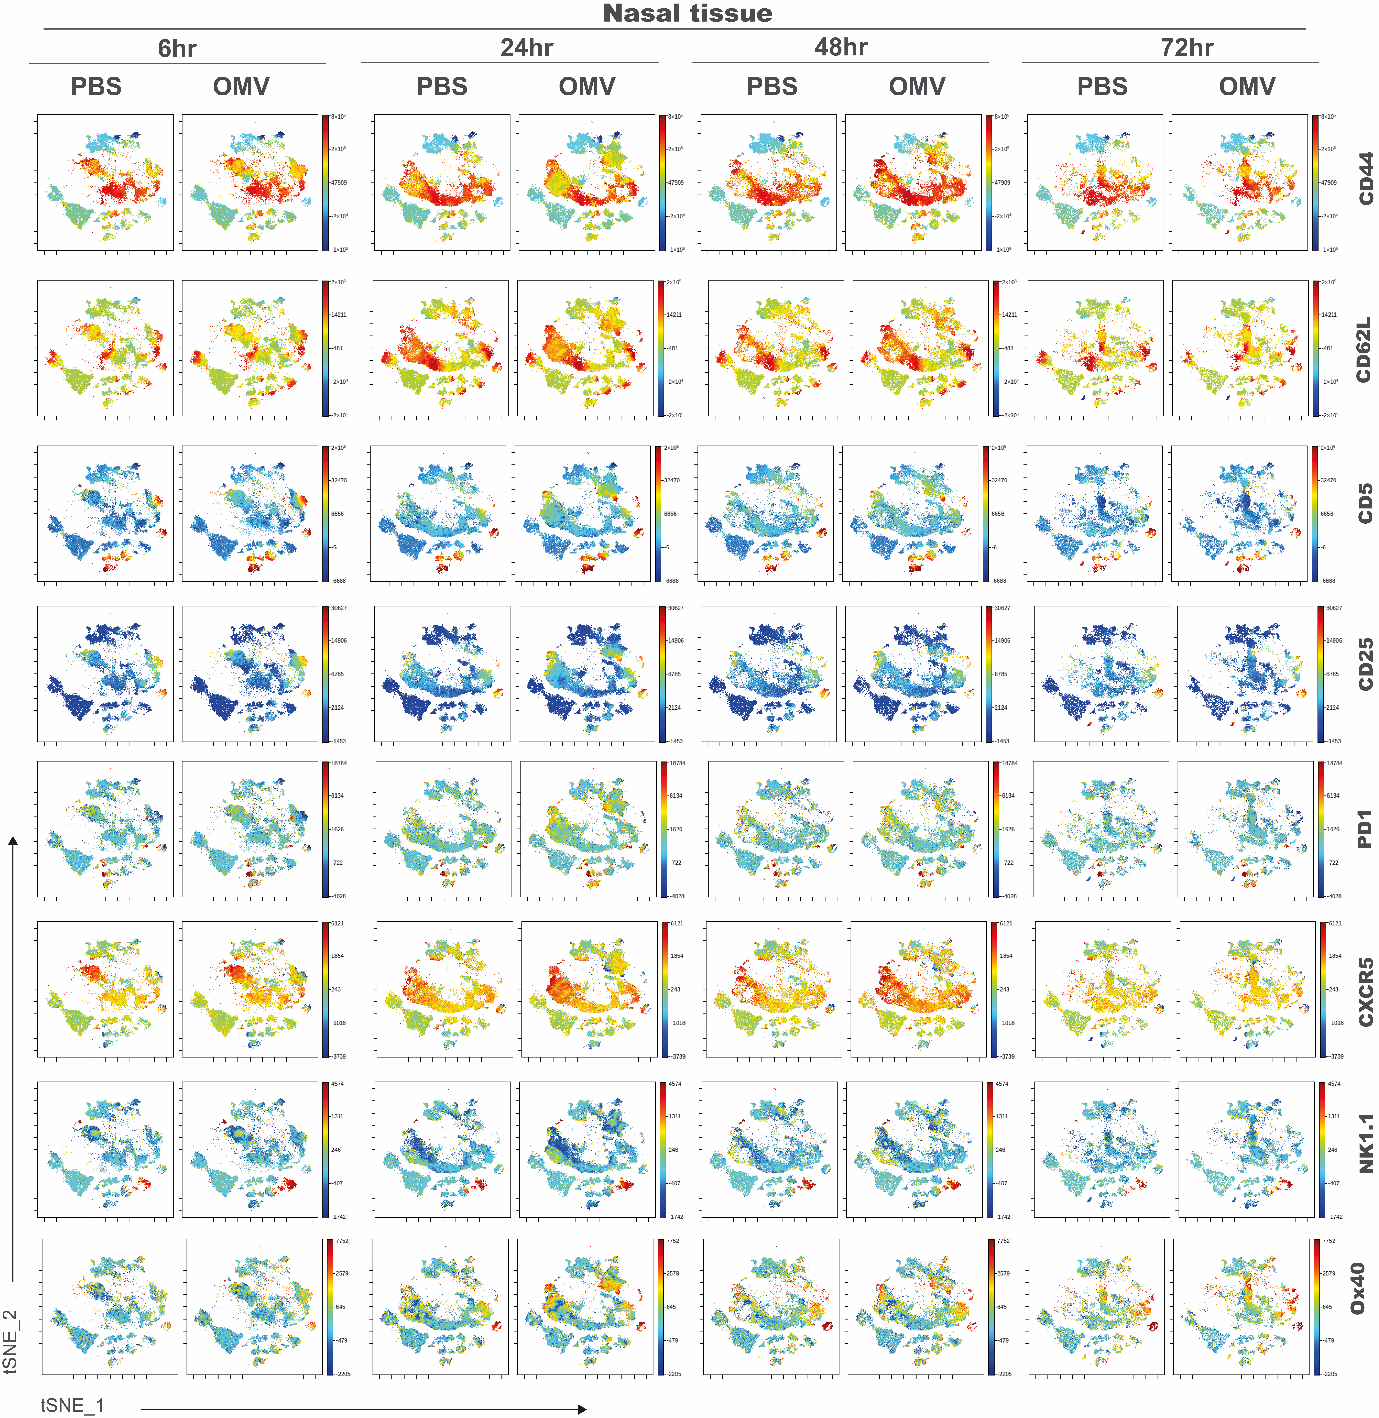


**Fig S4 (continued):** **t-SNE plots showing marker expression patterns in nasal tissue.**
t-SNE plots depict the expression profiles of key markers in nasal tissue following OMV vaccination. Plots are concatenated from individual samples (n=5) for each time point and condition. Each marker is displayed with its own independent color scale to indicate relative expression intensity.


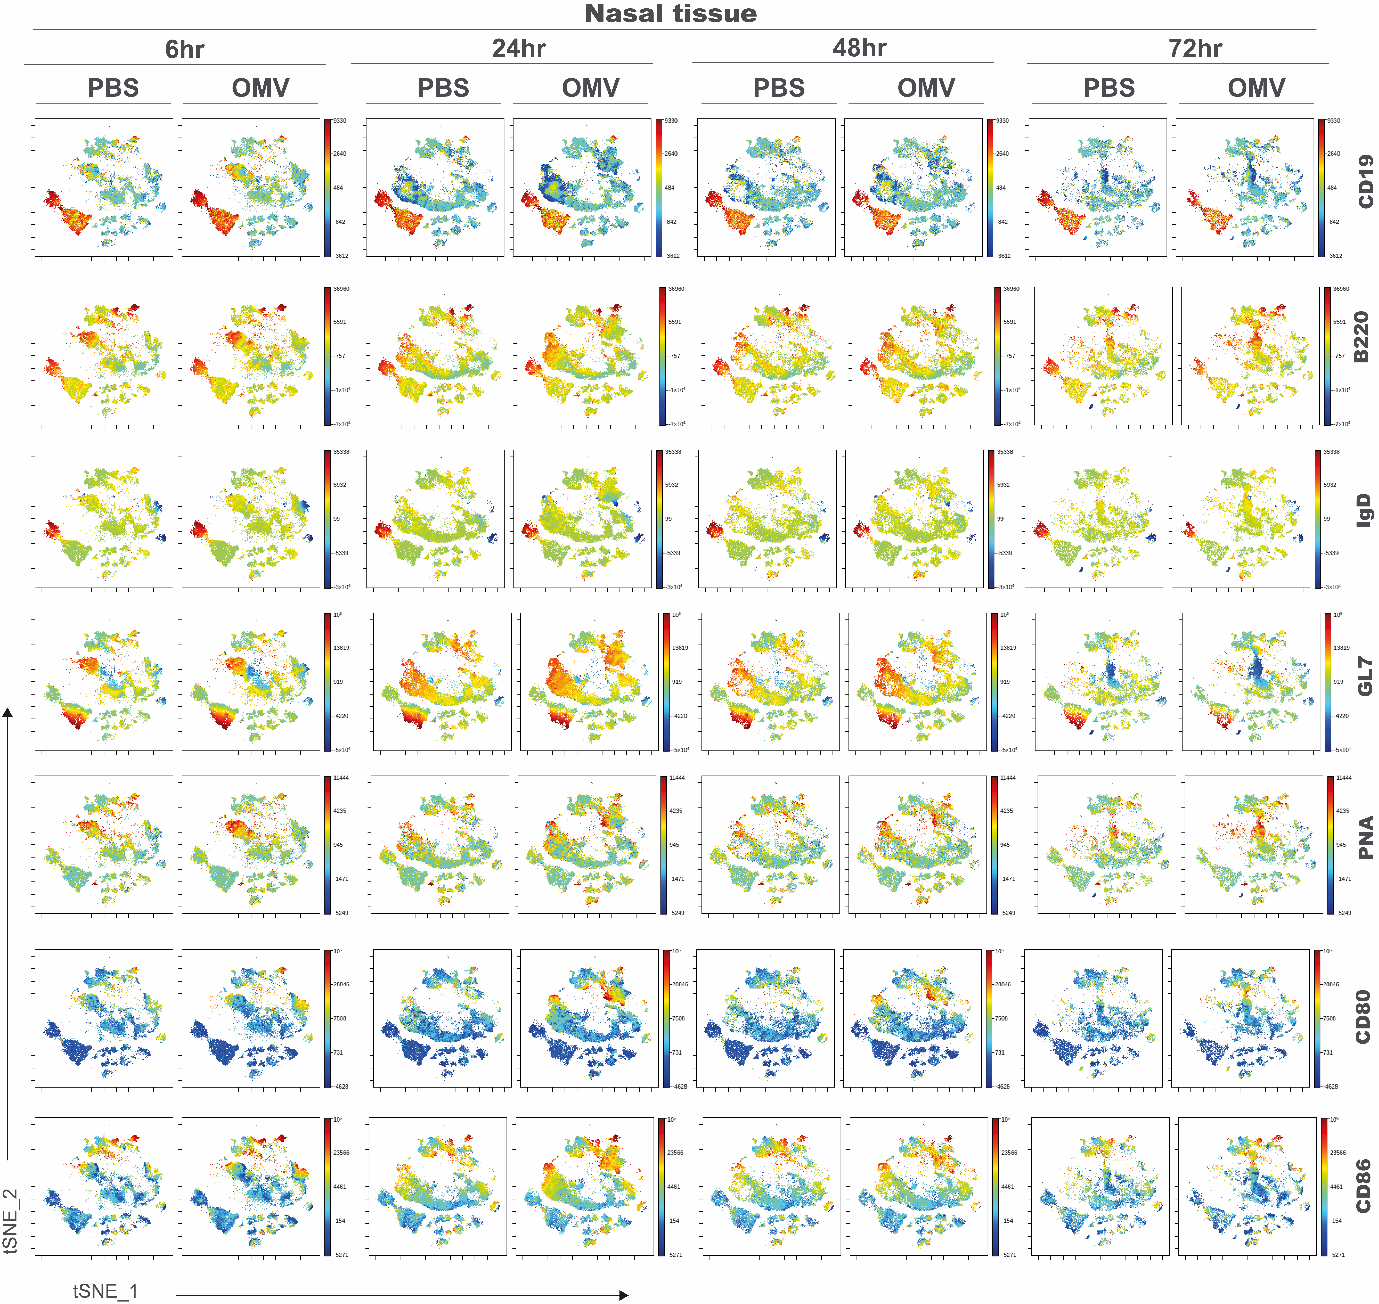


**Fig S4 (continued):** **t-SNE plots showing marker expression patterns in nasal tissue.**
t-SNE plots depict the expression profiles of key markers in nasal tissue following OMV vaccination. Plots are concatenated from individual samples (n=5) for each time point and condition. Each marker is displayed with its own independent color scale to indicate relative expression intensity.


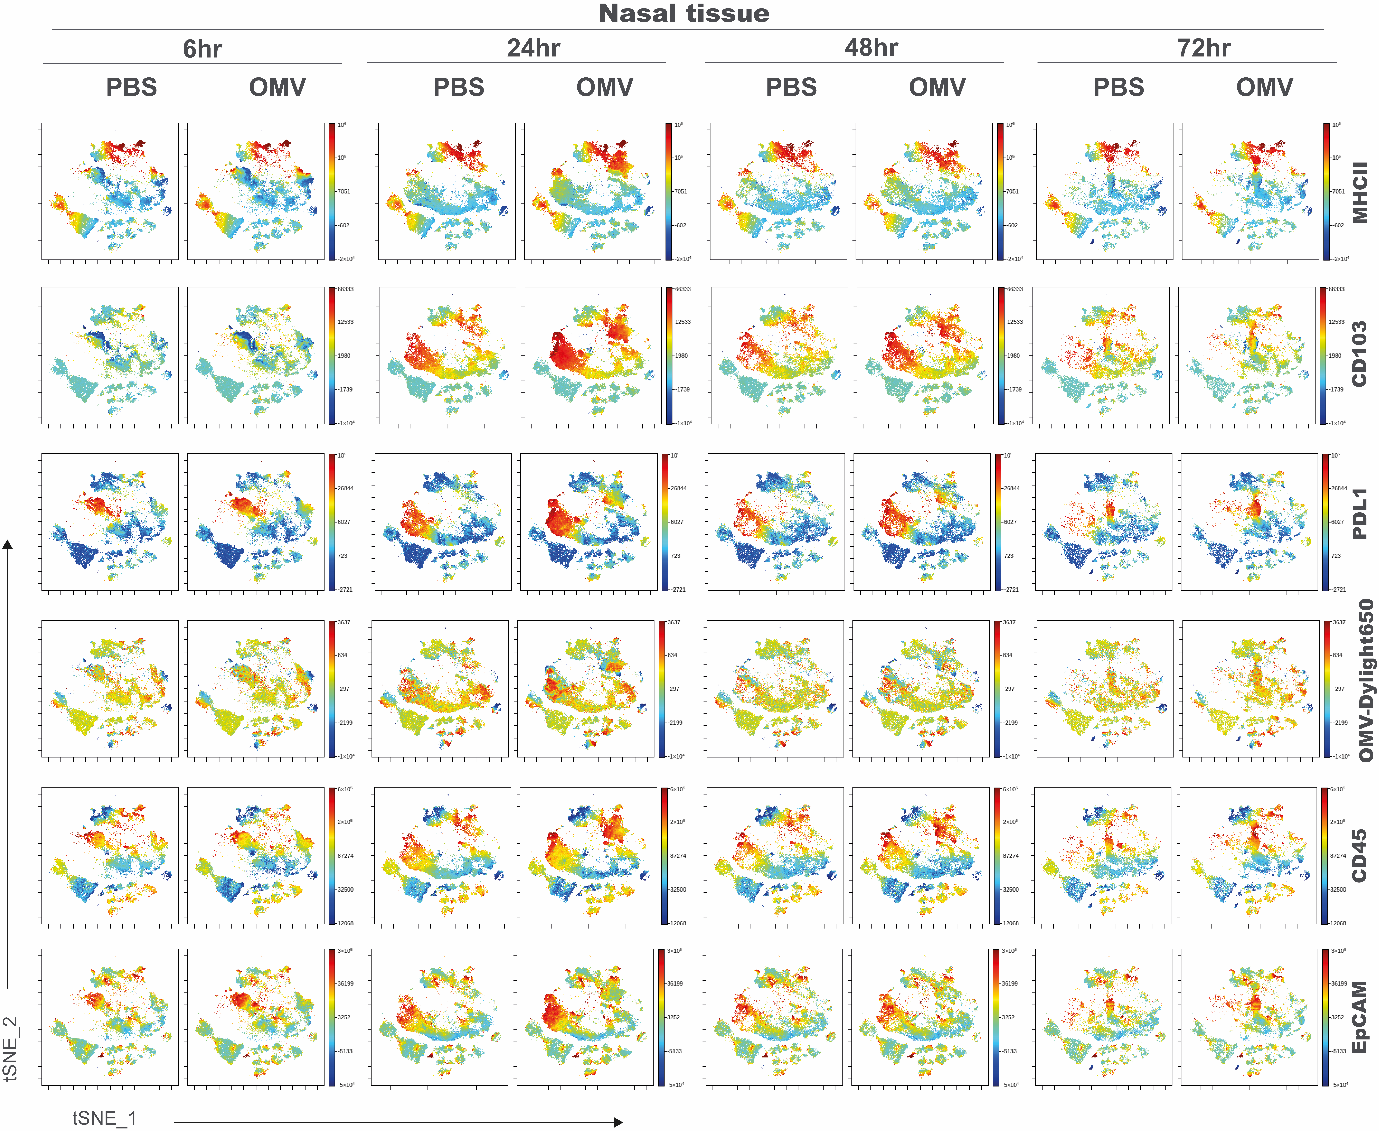


**Fig S4 (continued):** **t-SNE plots showing marker expression patterns in nasal tissue.**
t-SNE plots depict the expression profiles of key markers in nasal tissue following OMV vaccination. Plots are concatenated from individual samples (n=5) for each time point and condition. Each marker is displayed with its own independent color scale to indicate relative expression intensity.


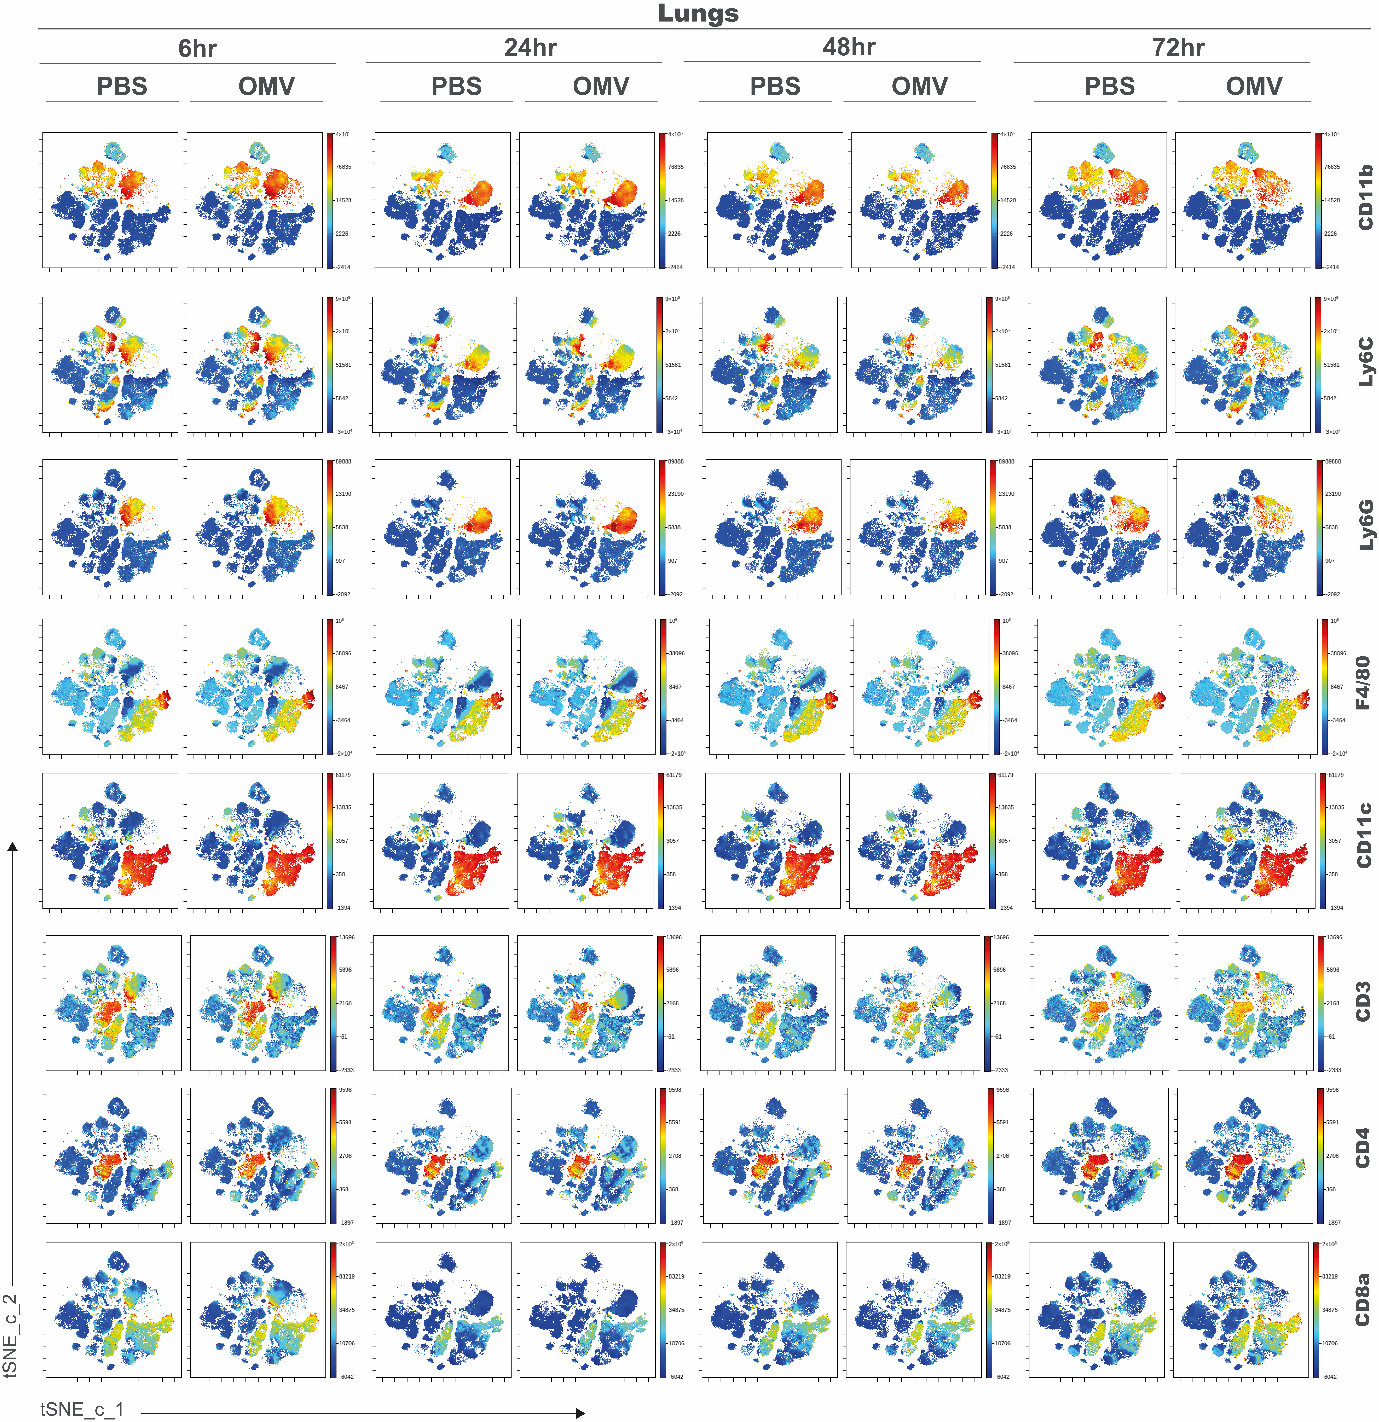


**Fig. S5:** **t-SNE plots showing marker expression patterns in lungs.** t-SNE plots depict the expression profiles of key markers in lungs following OMV vaccination. Plots are concatenated from individual samples (n=5) for each time point and condition. Each marker is displayed with its own independent color scale to indicate relative expression intensity.


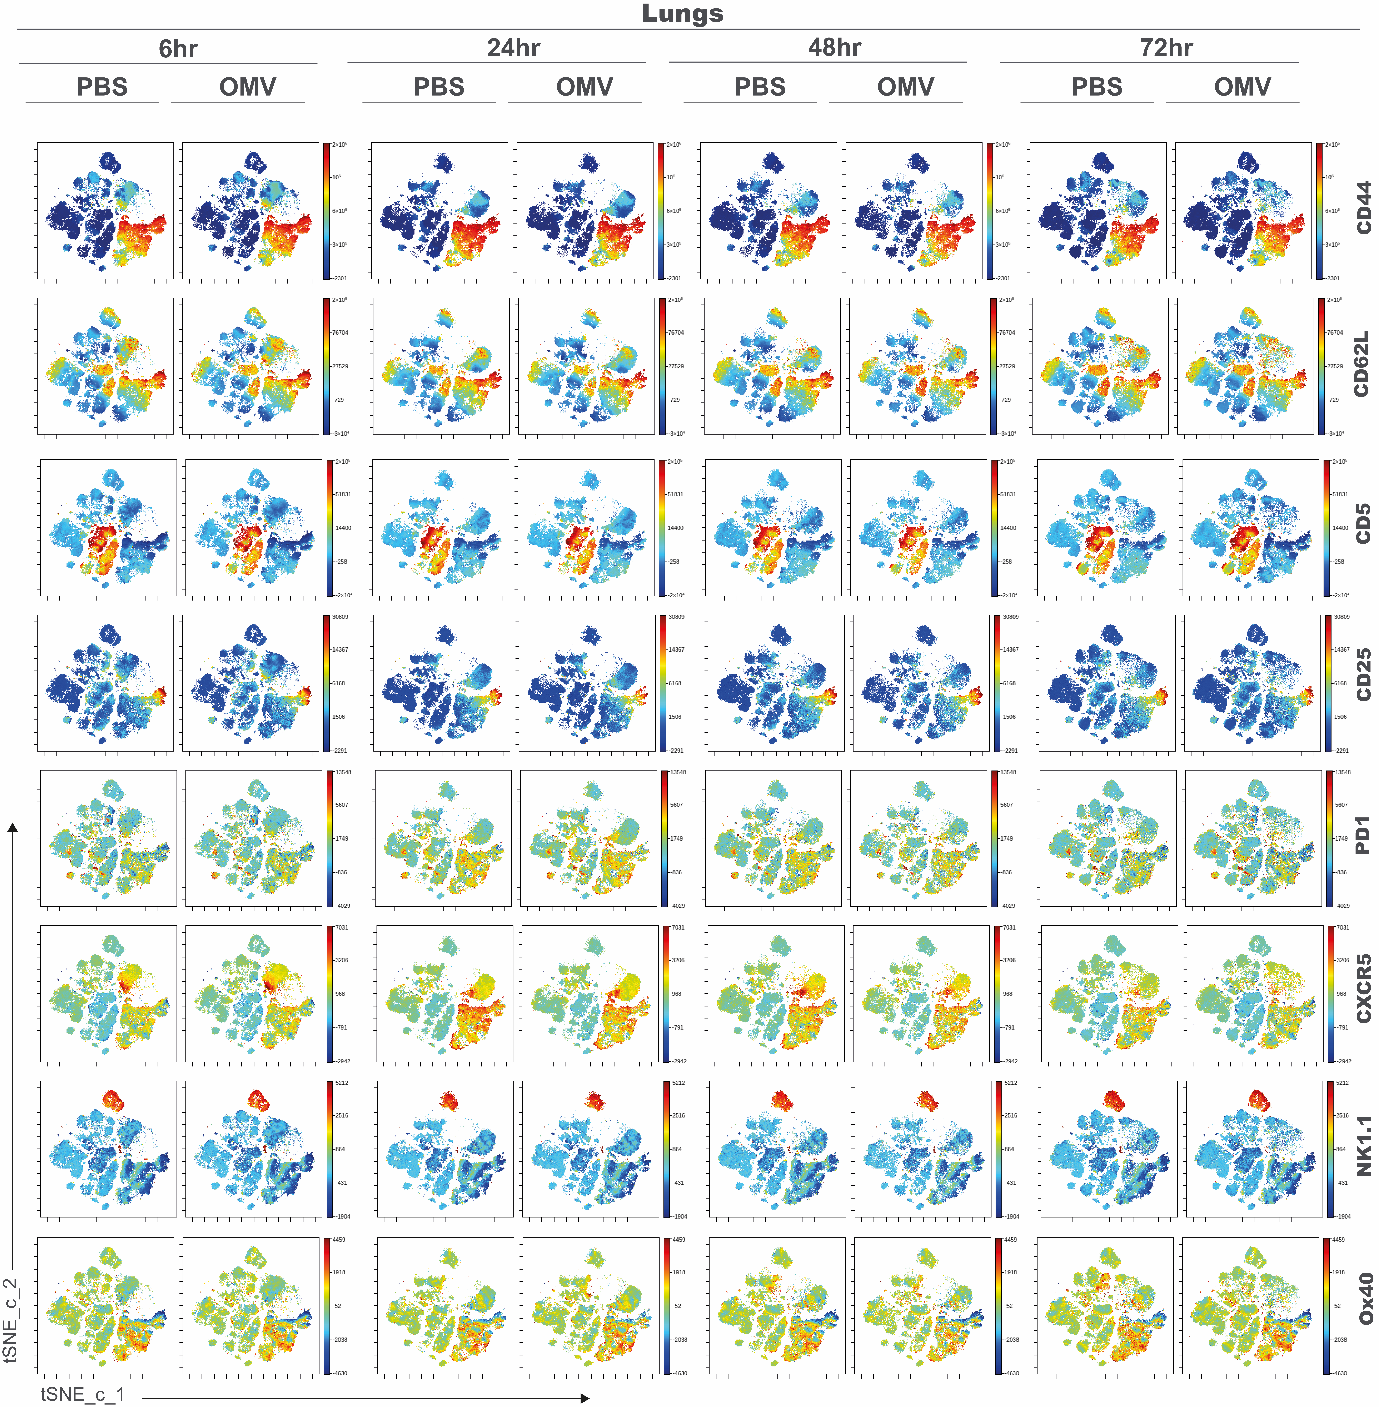


**Fig. S5 (continued):** **t-SNE plots showing marker expression patterns in lungs.** t-SNE plots depict the expression profiles of key markers in lungs following OMV vaccination. Plots are concatenated from individual samples (n=5) for each time point and condition. Each marker is displayed with its own independent color scale to indicate relative expression intensity.


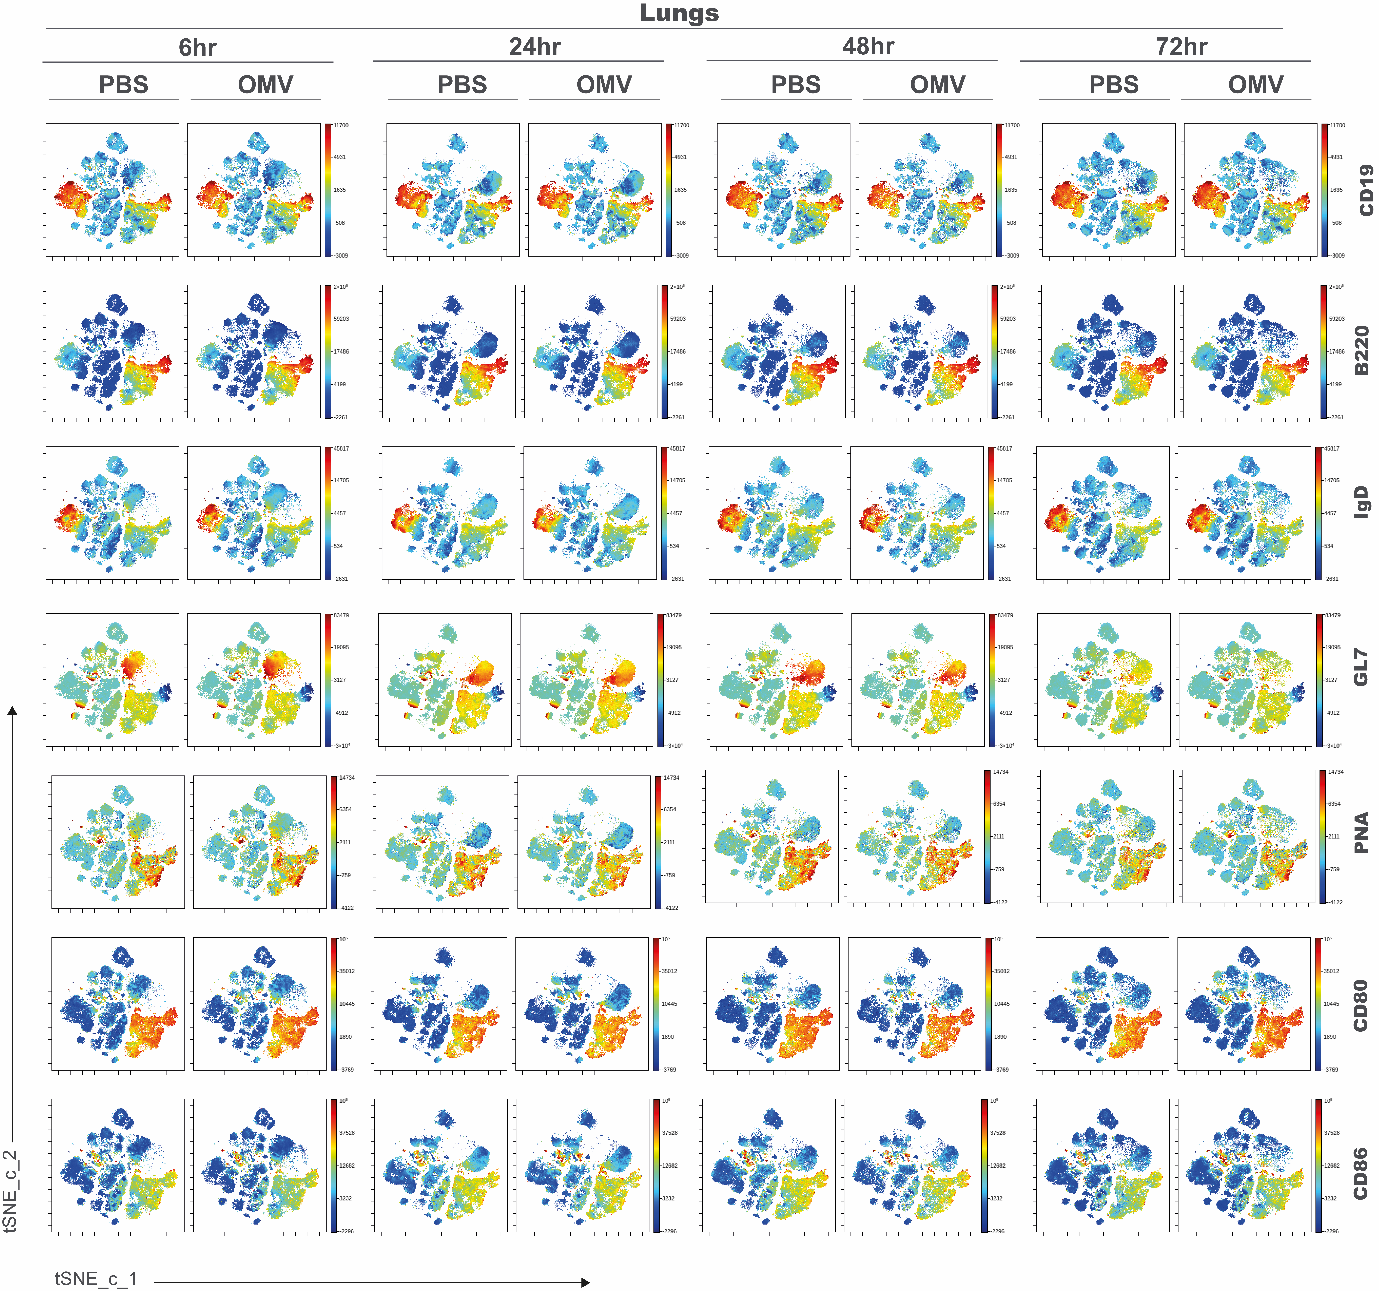


**Fig. S5 (continued):** **t-SNE plots showing marker expression patterns in lungs.** t-SNE plots depict the expression profiles of key markers in lungs following OMV vaccination. Plots are concatenated from individual samples (n=5) for each time point and condition. Each marker is displayed with its own independent color scale to indicate relative expression intensity.

**
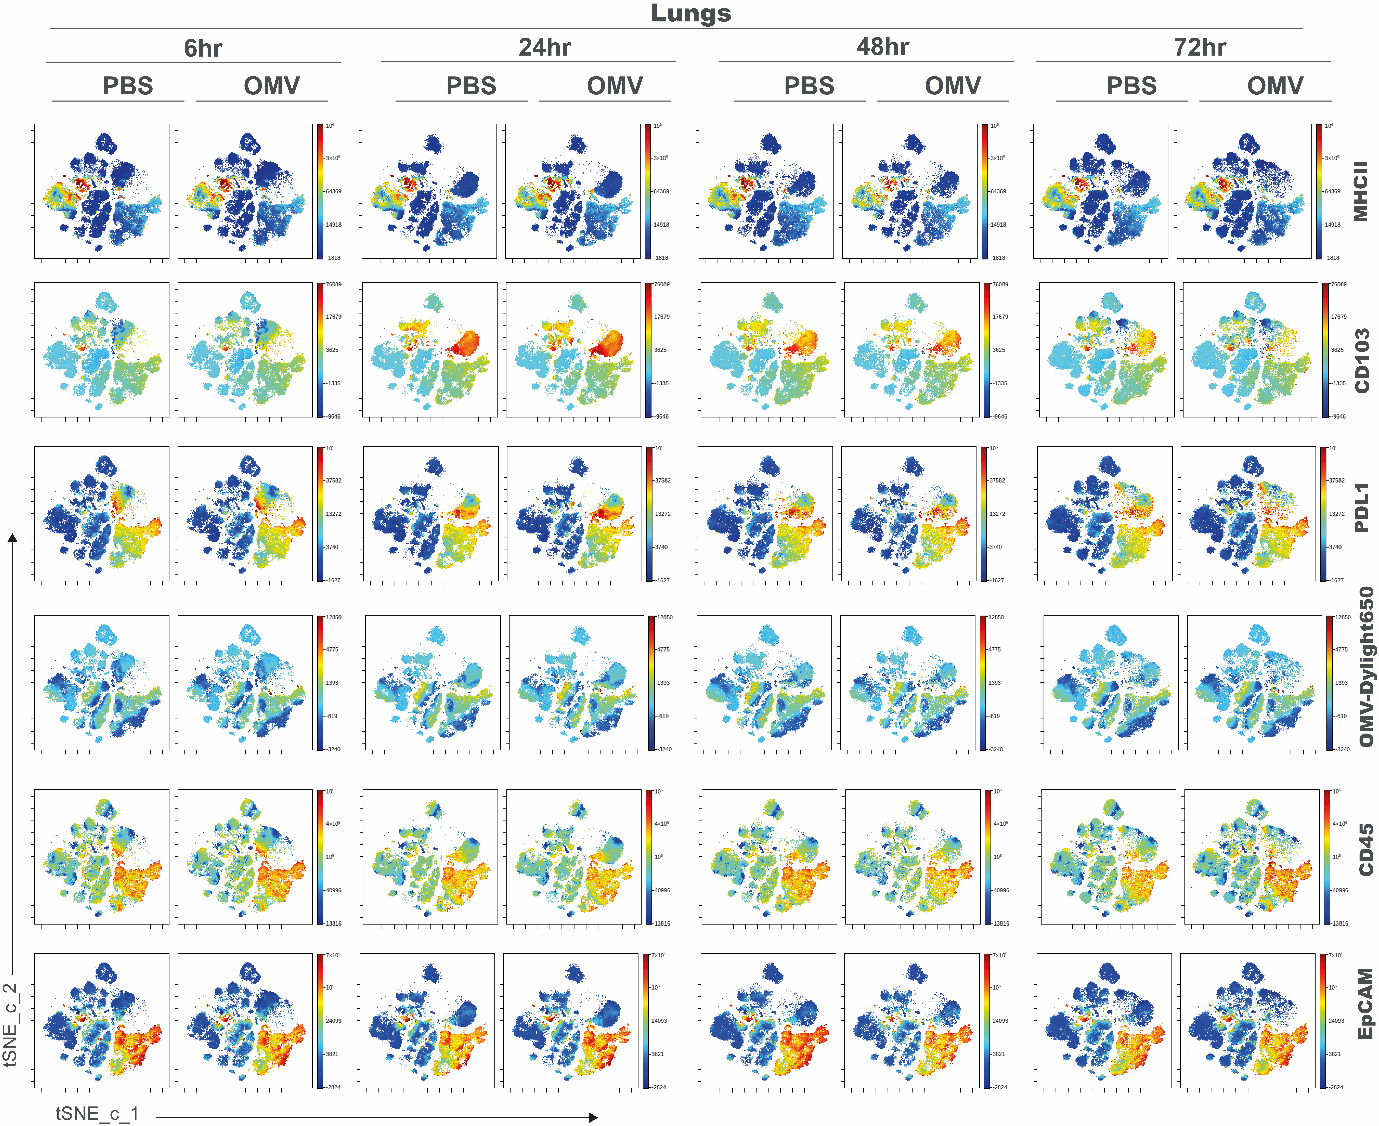
**

**Fig. S5 (continued):** **t-SNE plots showing marker expression patterns in lungs.** t-SNE plots depict the expression profiles of key markers in lungs following OMV vaccination. Plots are concatenated from individual samples (n=5) for each time point and condition. Each marker is displayed with its own independent color scale to indicate relative expression intensity.


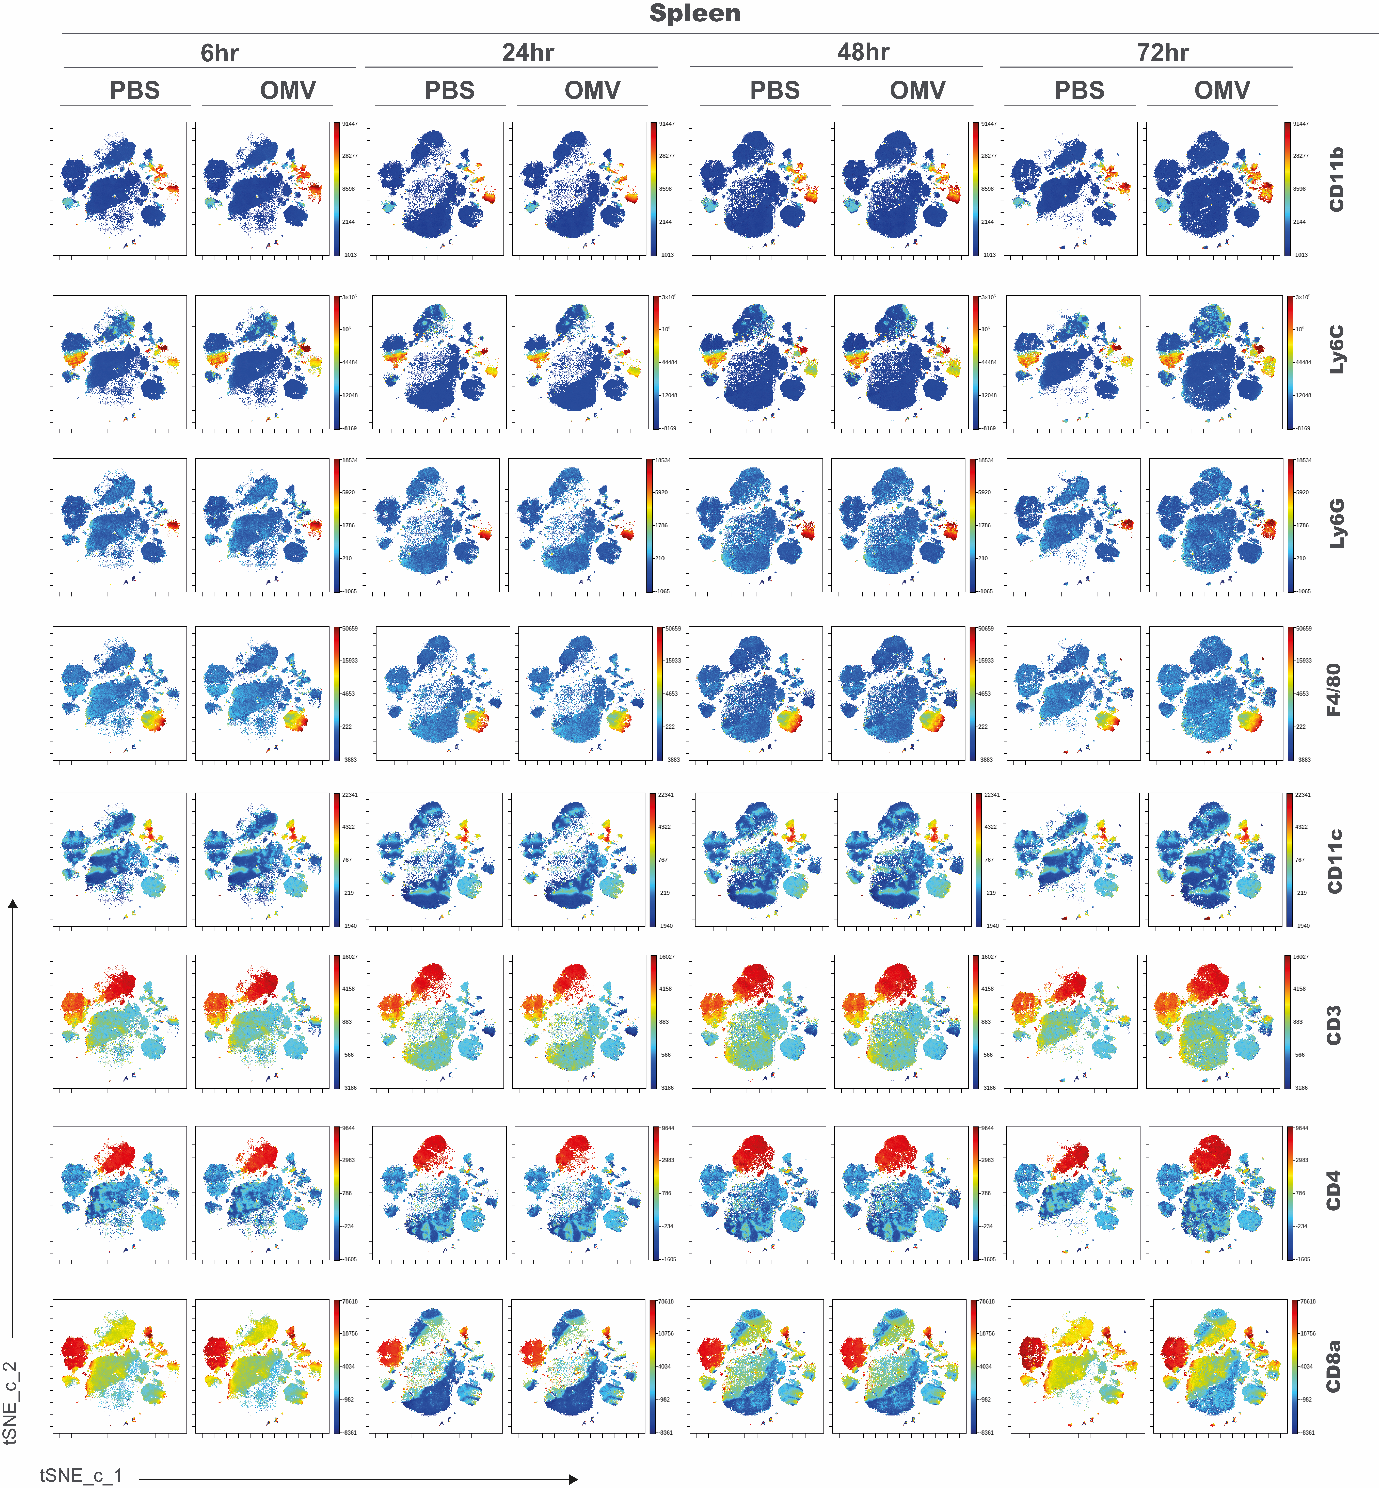


**Fig. S6:** **t-SNE plots showing marker expression patterns in spleen.** t-SNE plots depict the expression profiles of key markers in spleen following OMV vaccination. Plots are concatenated from individual samples (n=5) for each time point and condition. Each marker is displayed with its own independent color scale to indicate relative expression intensity.


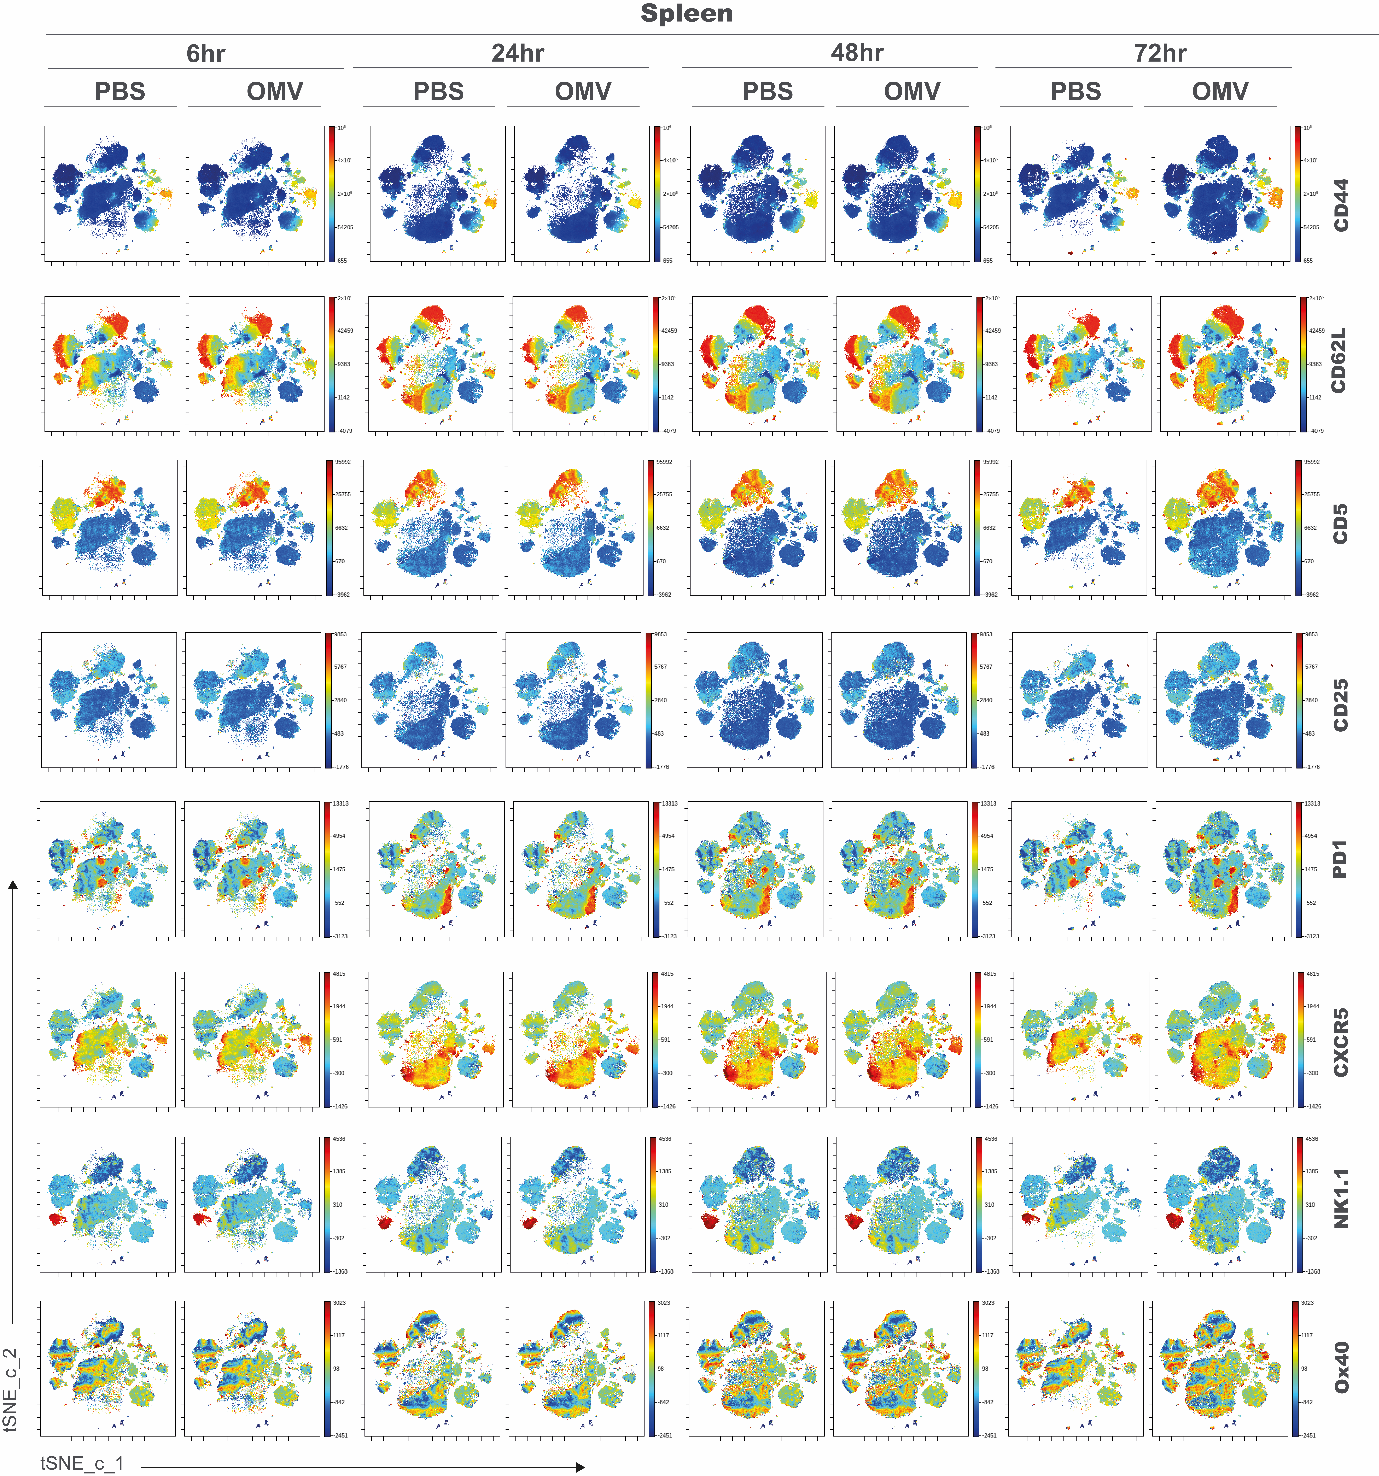


**Fig. S6 (continued):** **t-SNE plots showing marker expression patterns in spleen.** t-SNE plots depict the expression profiles of key markers in spleen following OMV vaccination. Plots are concatenated from individual samples (n=5) for each time point and condition. Each marker is displayed with its own independent color scale to indicate relative expression intensity.


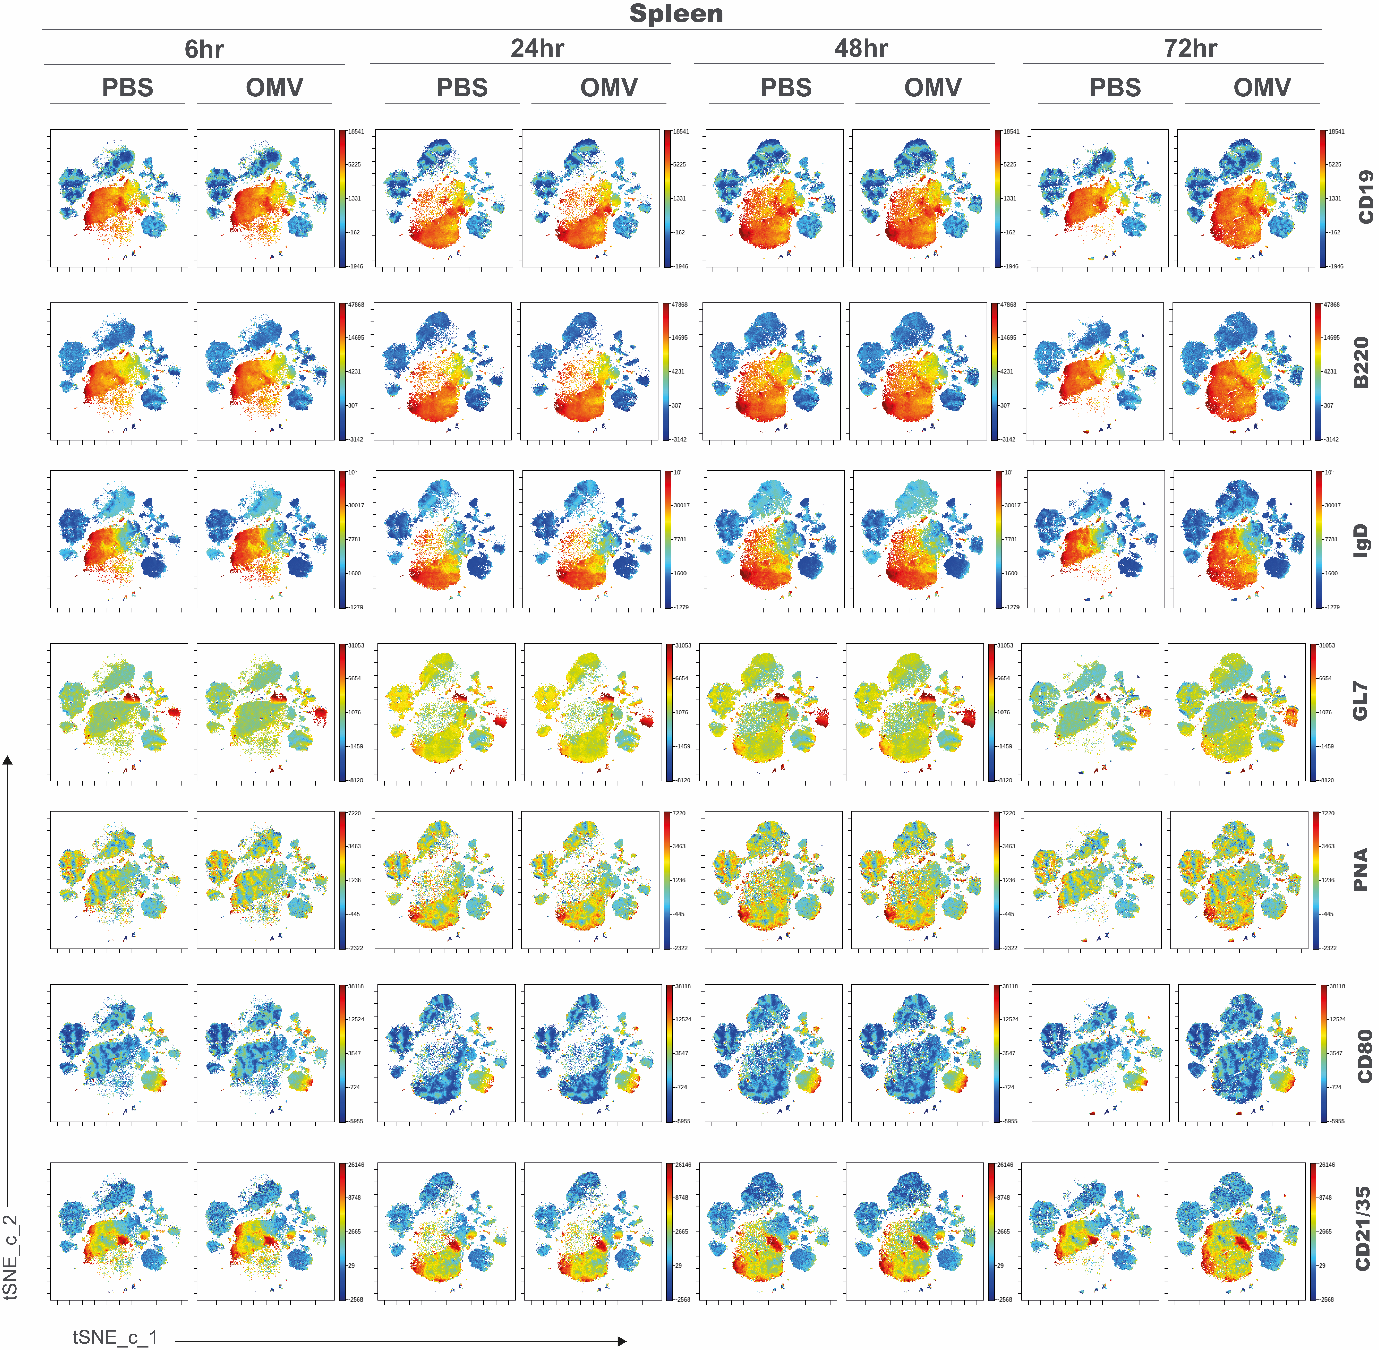


**Fig. S6 (continued):** **t-SNE plots showing marker expression patterns in spleen.** t-SNE plots depict the expression profiles of key markers in spleen following OMV vaccination. Plots are concatenated from individual samples (n=5) for each time point and condition. Each marker is displayed with its own independent color scale to indicate relative expression intensity.


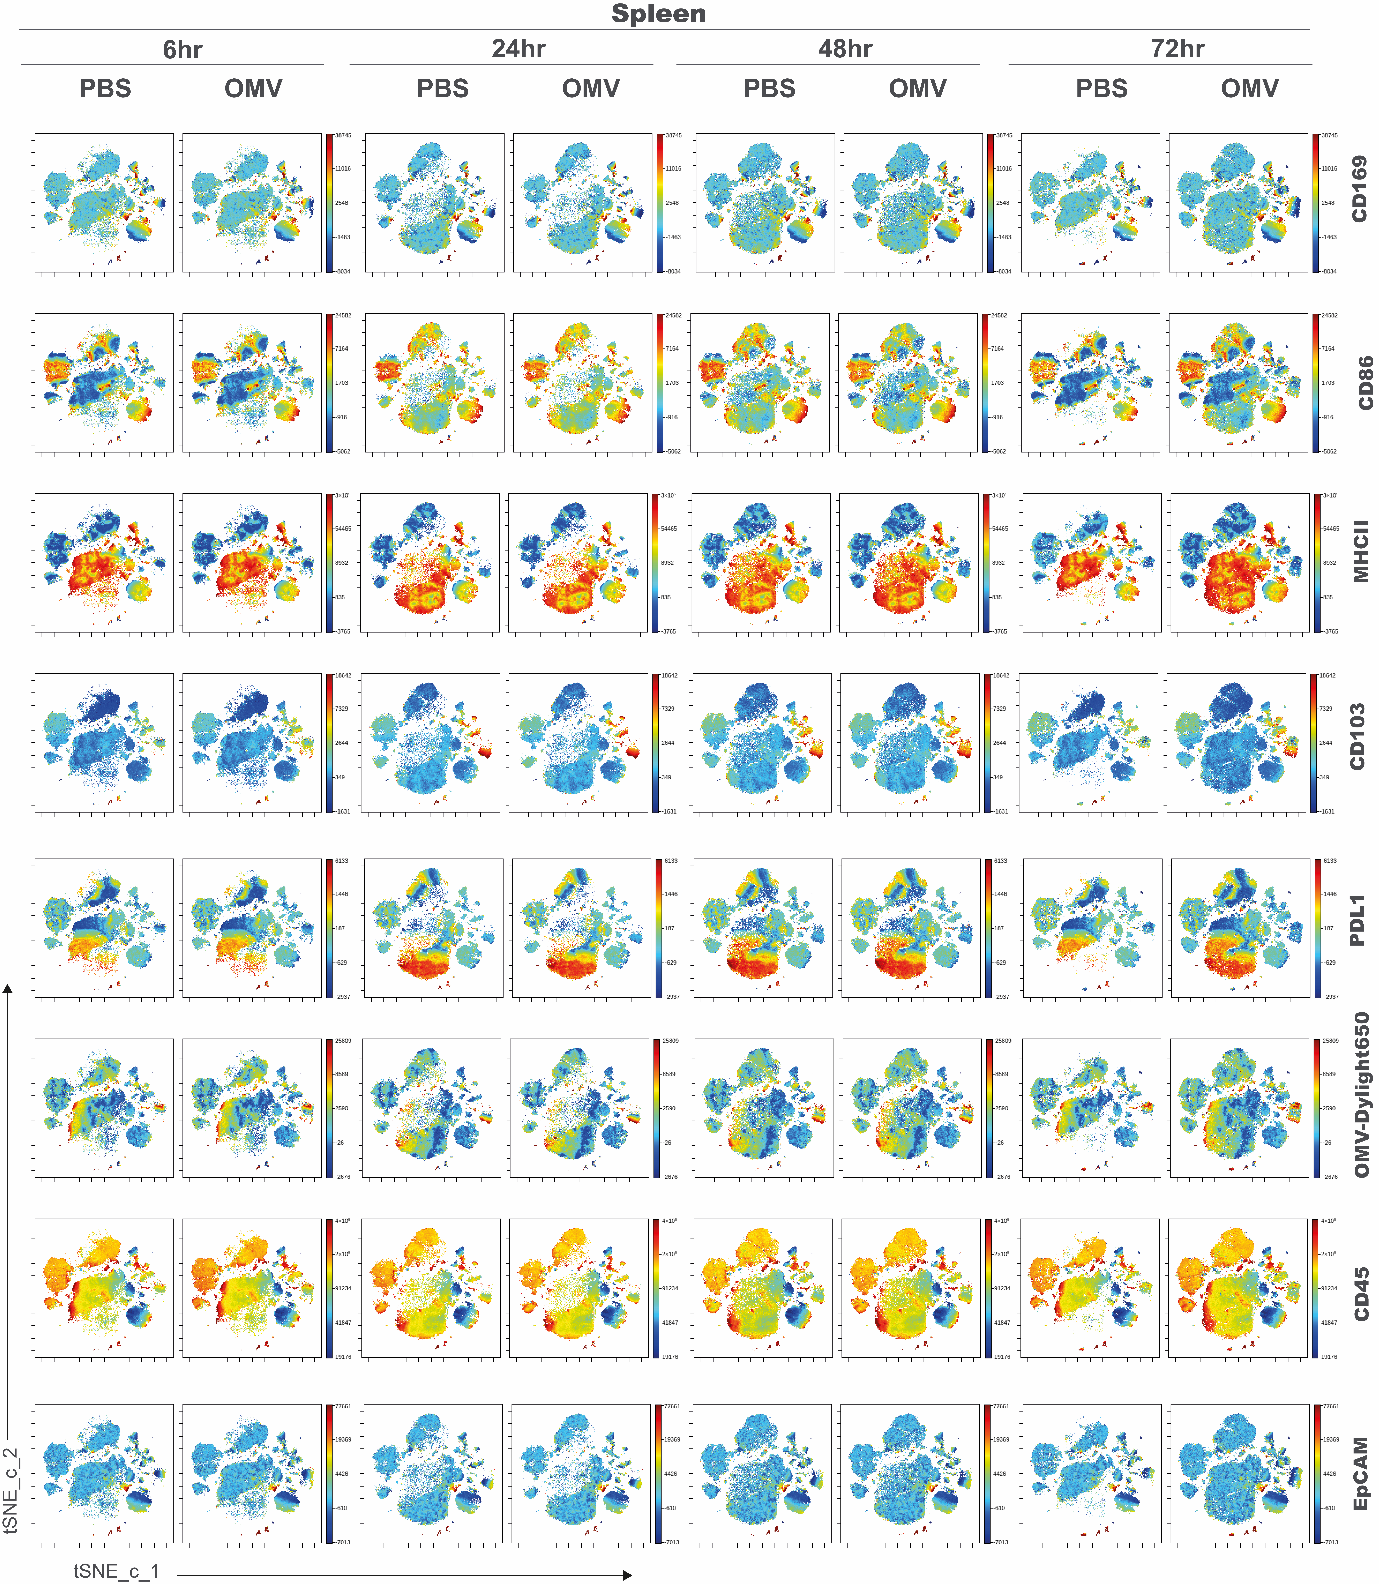


**Fig. S6 (continued):** **t-SNE plots showing marker expression patterns in spleen.** t-SNE plots depict the expression profiles of key markers in spleen following OMV vaccination. Plots are concatenated from individual samples (n=5) for each time point and condition. Each marker is displayed with its own independent color scale to indicate relative expression intensity.


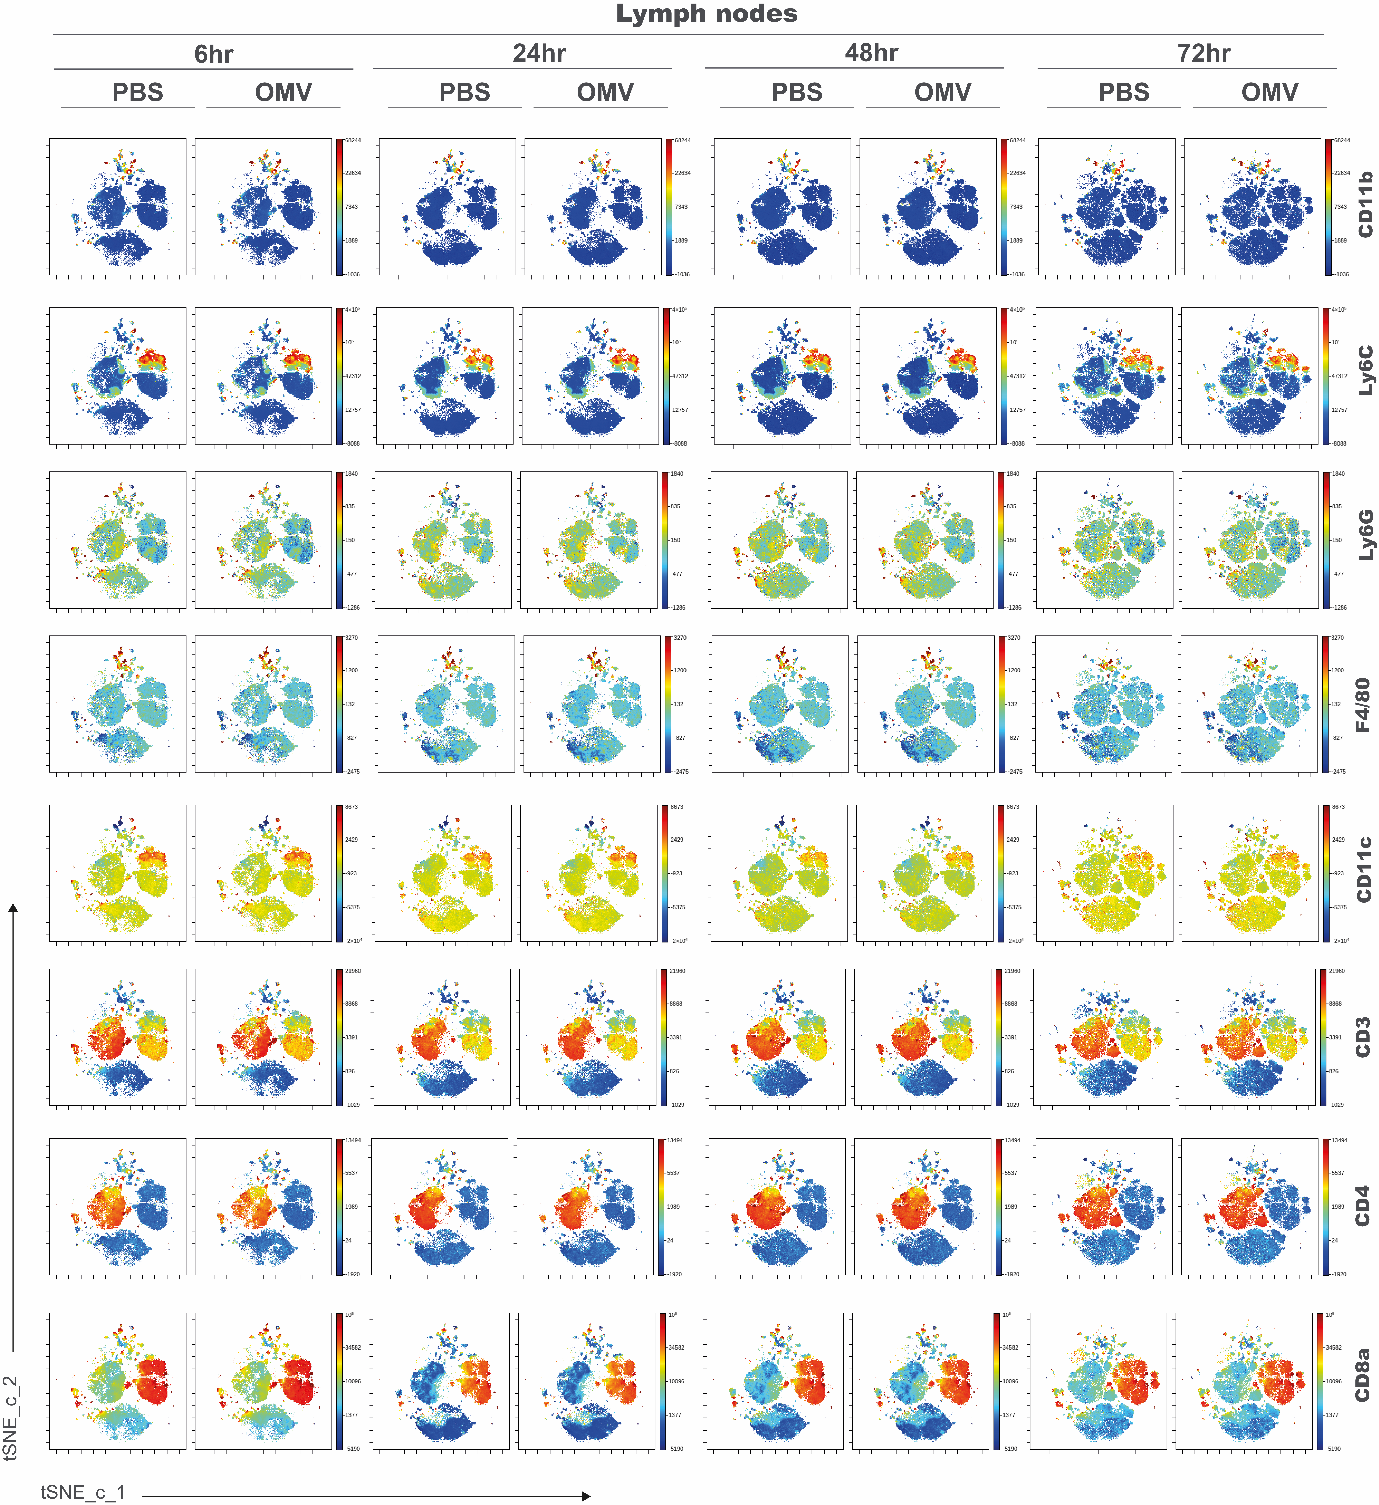


**Fig. S7:** **t-SNE plots showing marker expression patterns in lymph nodes.** t-SNE plots depict the expression profiles of key markers in lymph nodes following OMV vaccination. Plots are concatenated from individual samples (n=5) for each time point and condition. Each marker is displayed with its own independent color scale to indicate relative expression intensity.


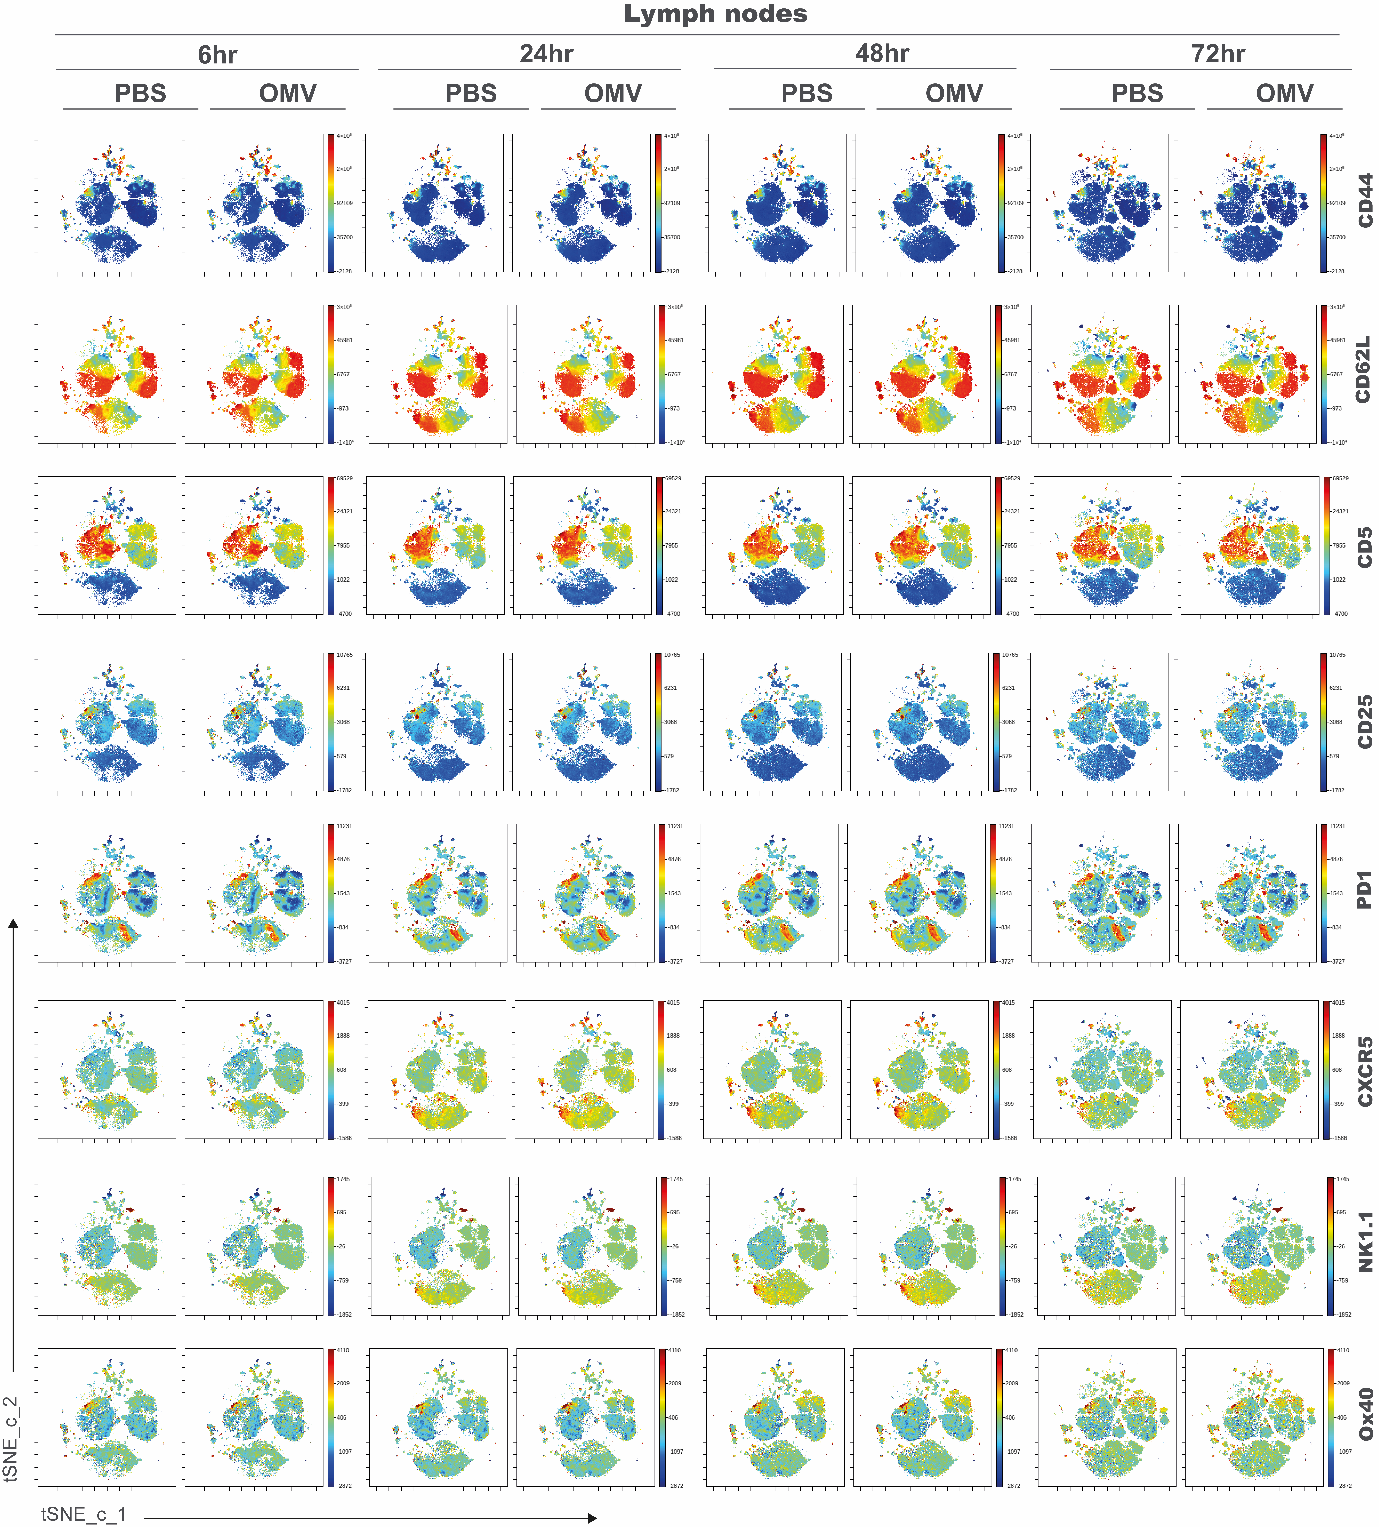


**Fig. S7 (Continued):**  **t-SNE plots showing marker expression patterns in lymph nodes.** t-SNE plots depict the expression profiles of key markers in lymph nodes following OMV vaccination. Plots are concatenated from individual samples (n=5) for each time point and condition. Each marker is displayed with its own independent color scale to indicate relative expression intensity.


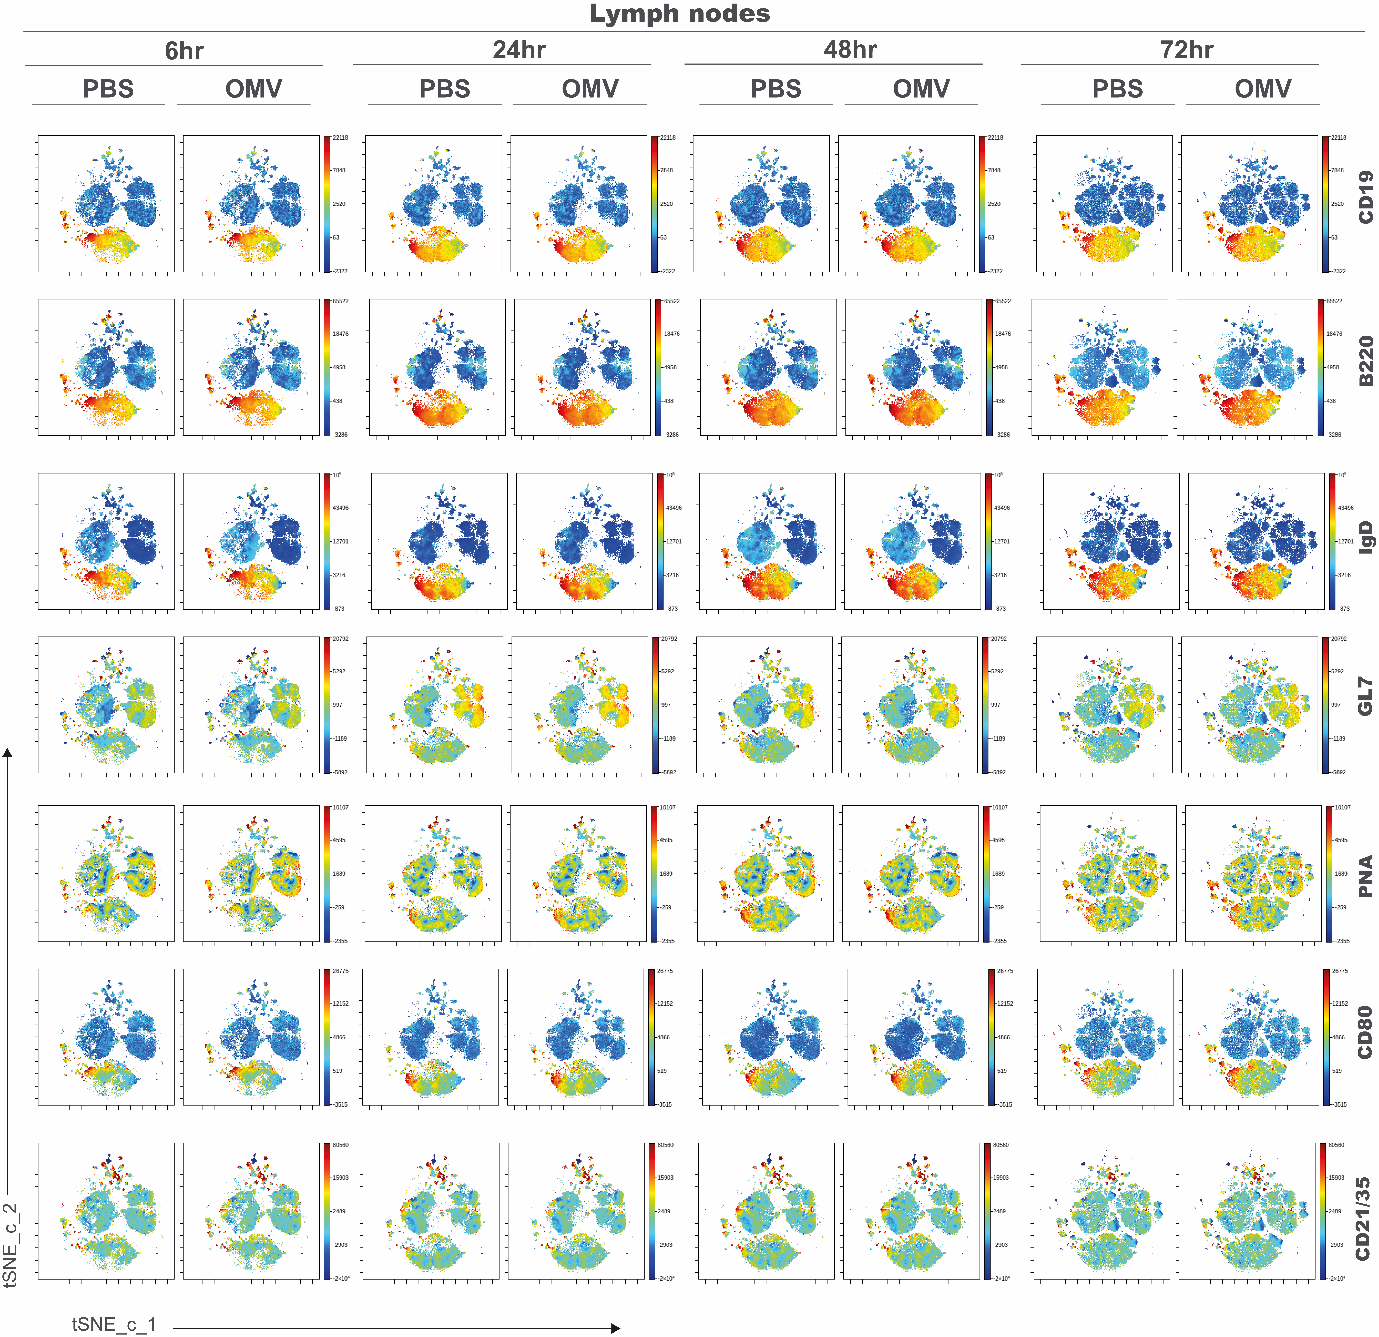


**Fig. S7 (Continued):**  **t-SNE plots showing marker expression patterns in lymph nodes.** t-SNE plots depict the expression profiles of key markers in lymph nodes following OMV vaccination. Plots are concatenated from individual samples (n=5) for each time point and condition. Each marker is displayed with its own independent color scale to indicate relative expression intensity.


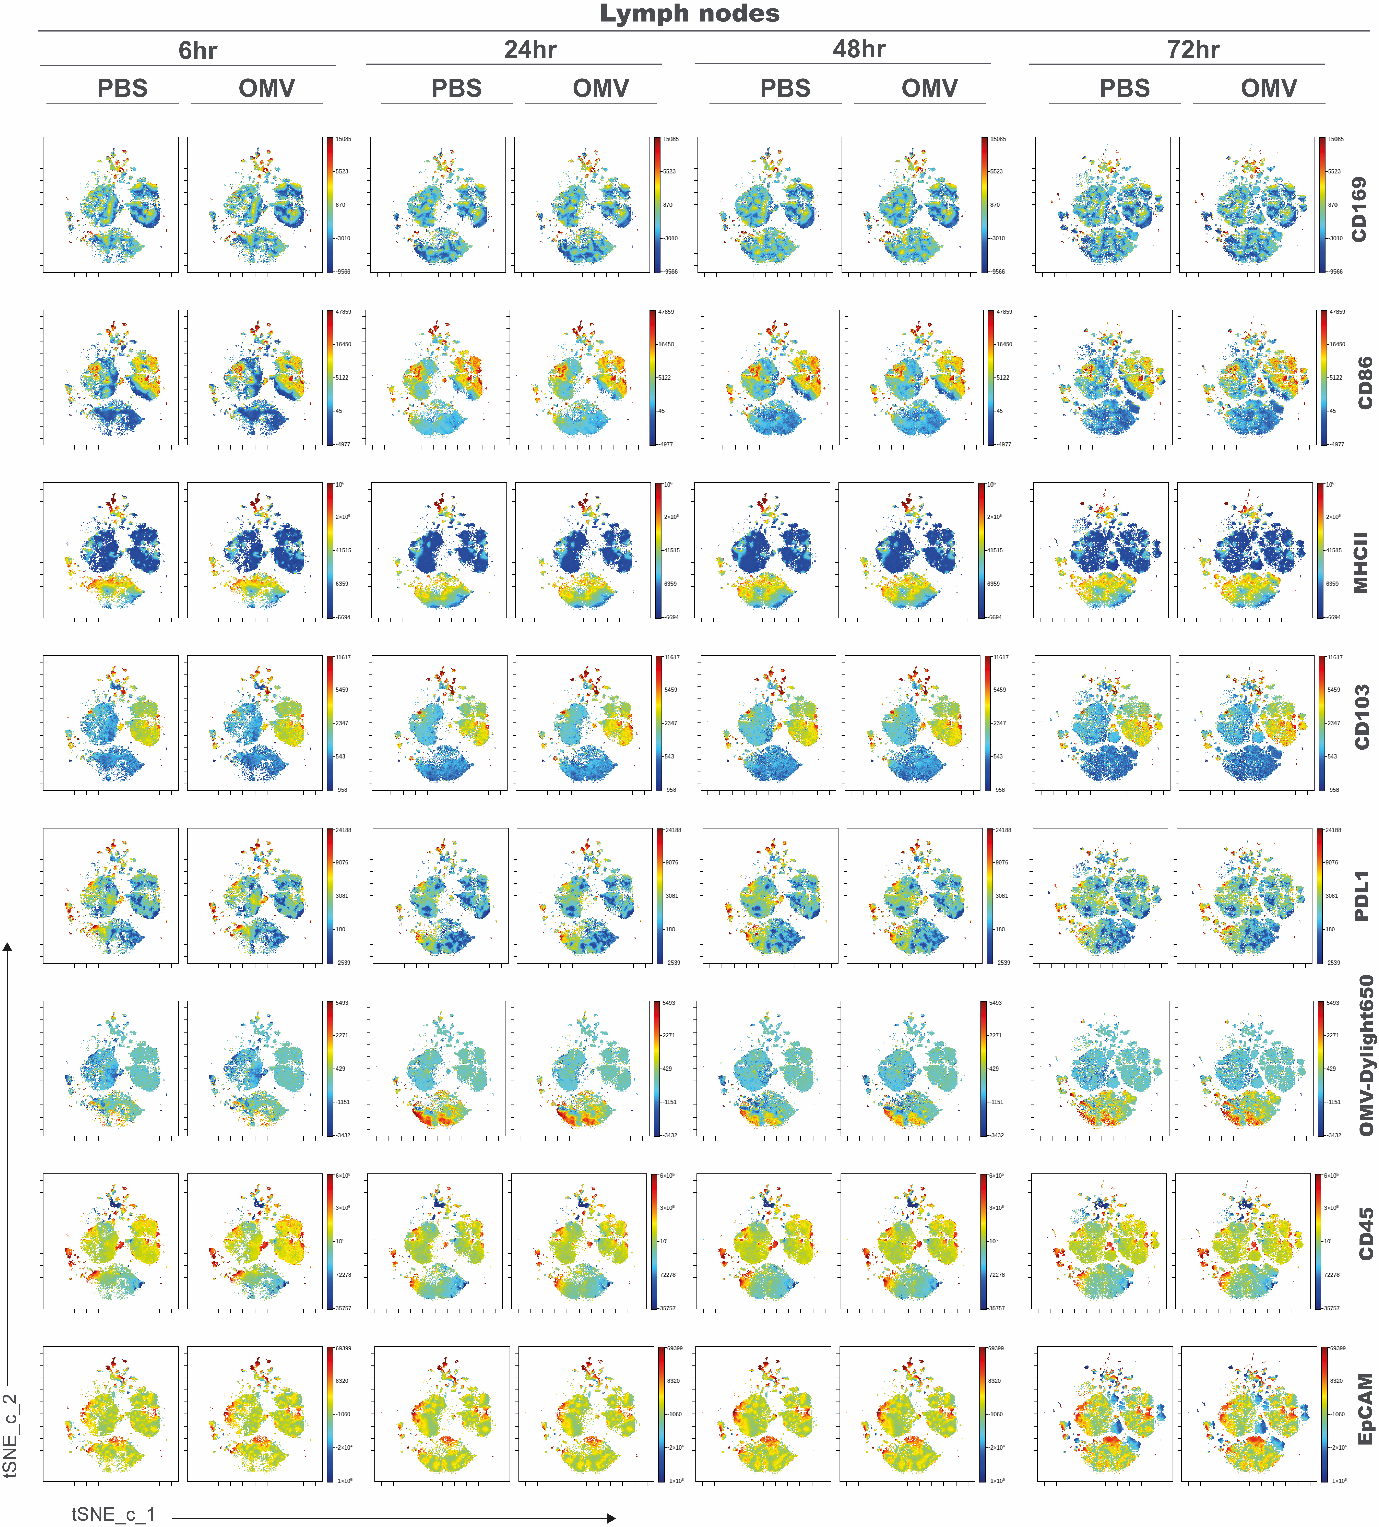


**Fig. S7 (Continued):**  **t-SNE plots showing marker expression patterns in lymph nodes.** t-SNE plots depict the expression profiles of key markers in lymph nodes following OMV vaccination. Plots are concatenated from individual samples (n=5) for each time point and condition. Each marker is displayed with its own independent color scale to indicate relative expression intensity.


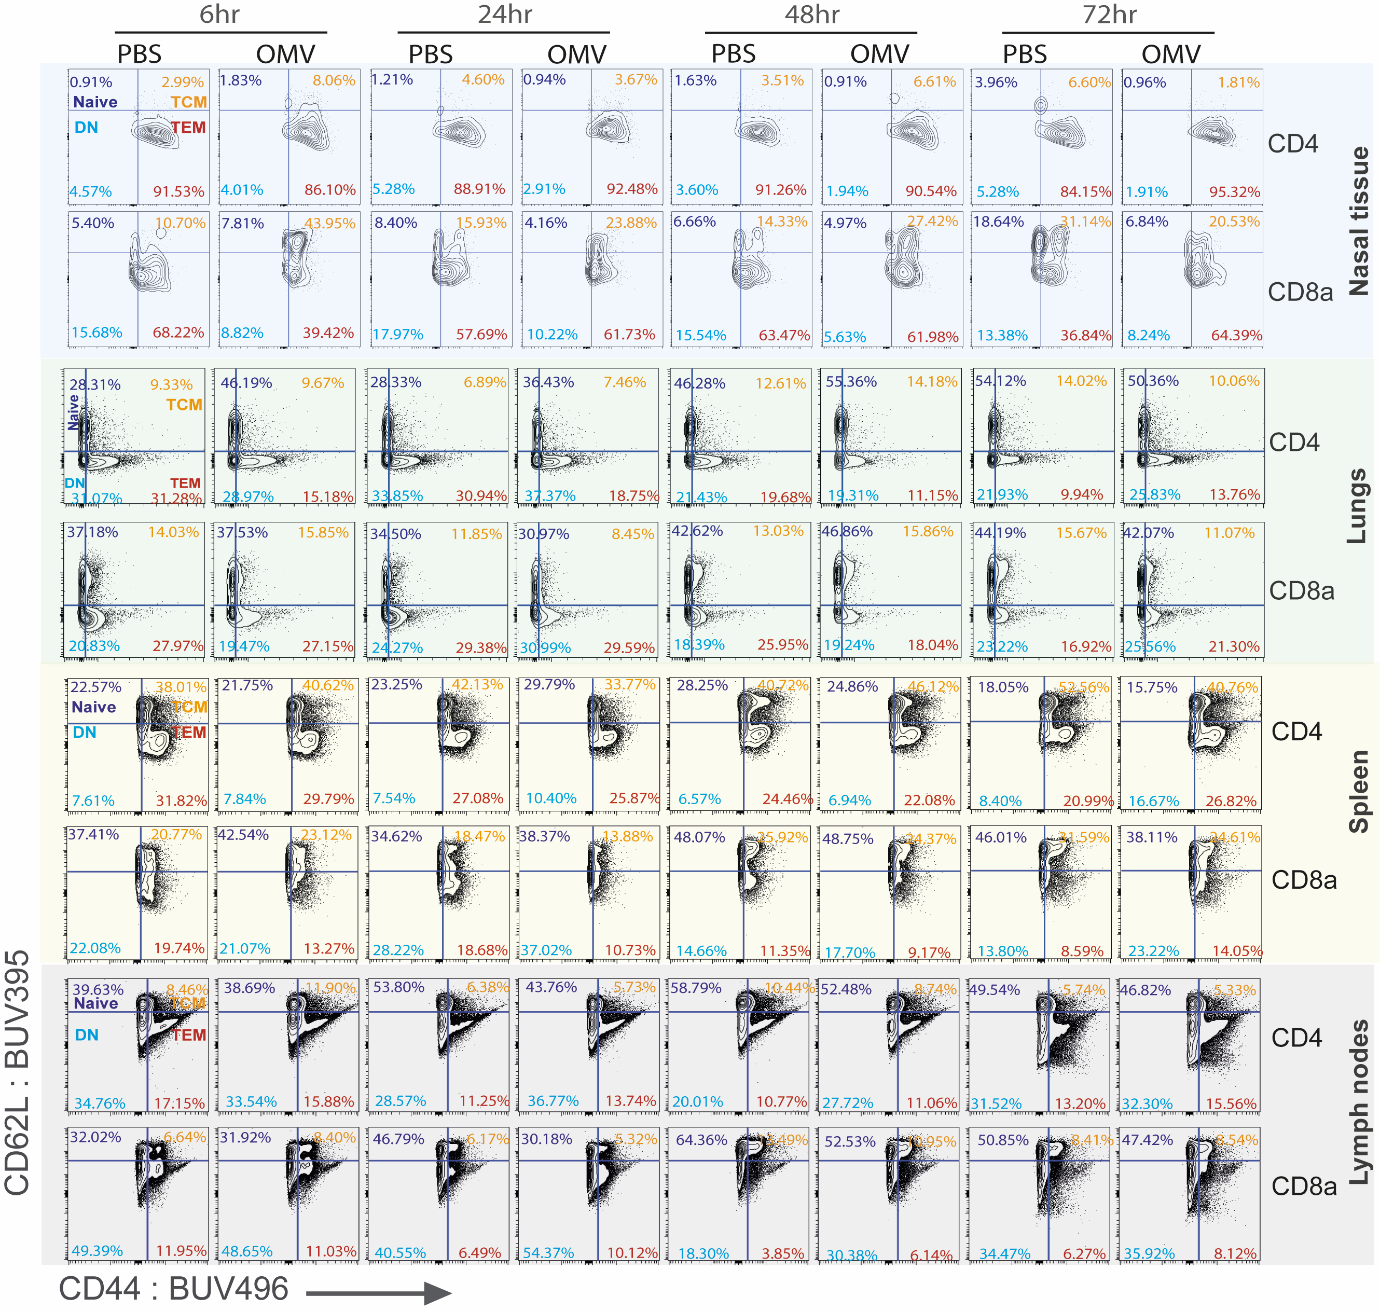


**Fig. S8**. Contour plots illustrating the spatio-temporal distribution and kinetics of major T cell subtypes post vaccination; contour plots are concatenates of individual samples and percentages represent mean values from individual samples (n = 5).


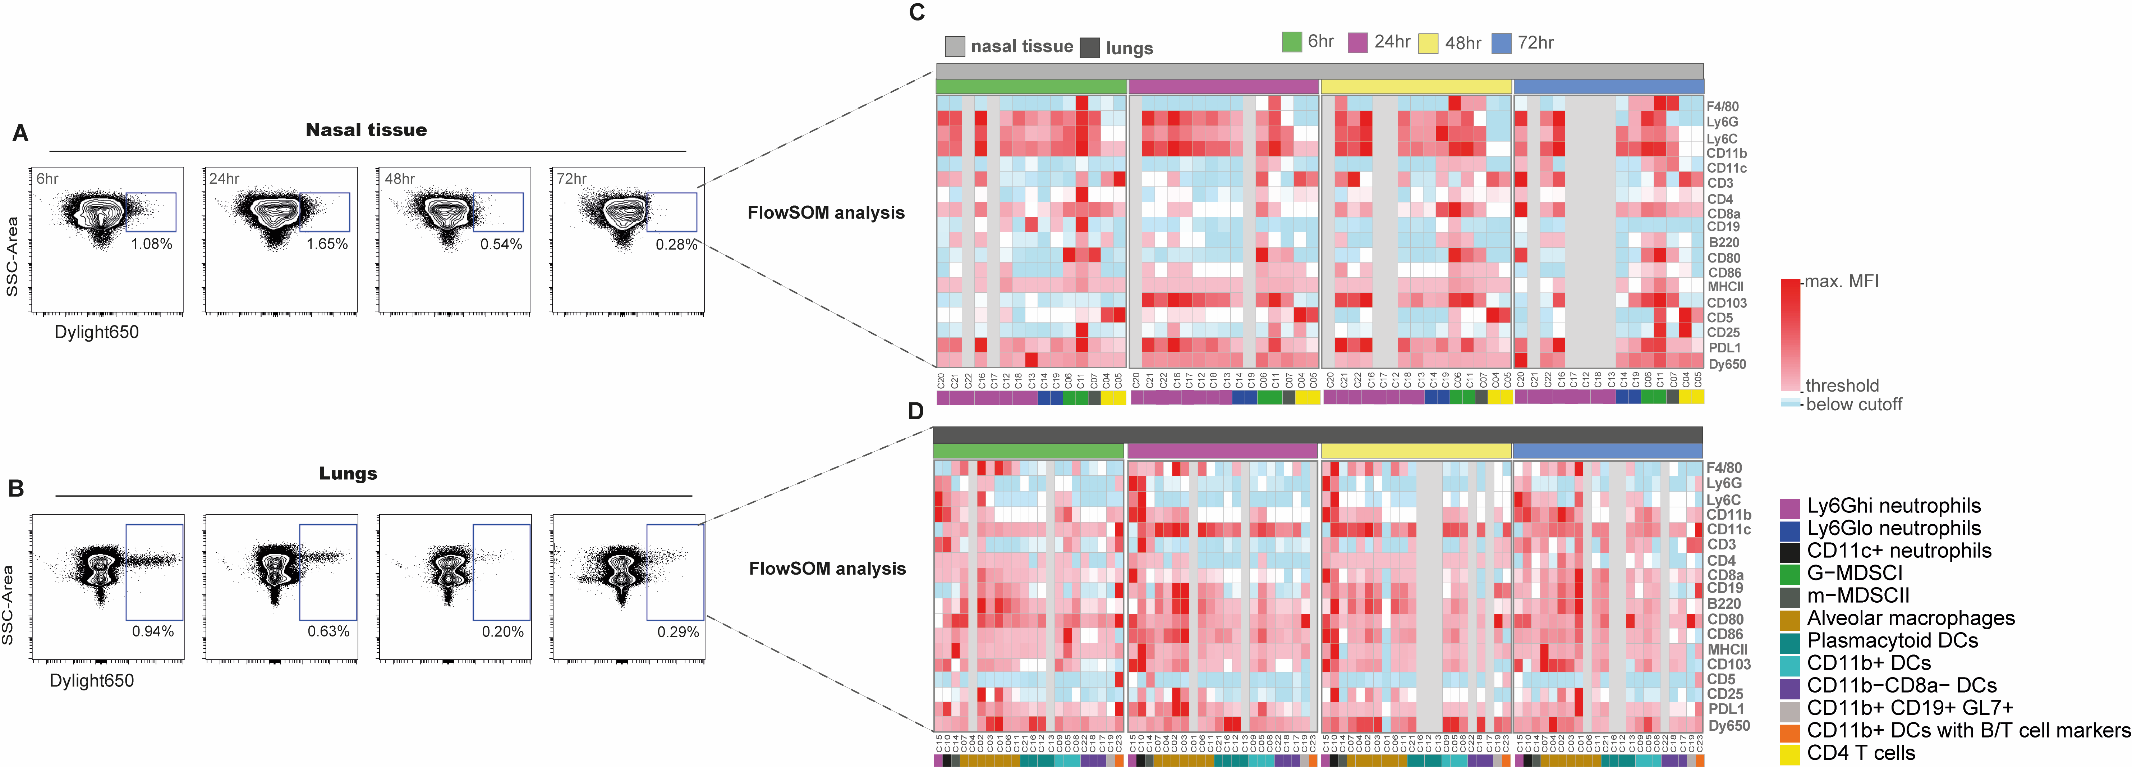


**Fig. S9:** **Characterization of OMV⁺ immune cell populations in nasal tissue and lungs. (A, B)** Contour plots showing OMV-positive populations in nasal tissue and lungs, with corresponding mean percentages from concatenated individual samples (n=4–5 per group). **(C, D)** Heatmaps presenting a detailed breakdown of OMV⁺ clusters identified by FlowSOM analysis within the OMV-positive gates from panels A and B. Median fluorescence intensities of respective markers are represented using the indicated color scale. The color panel on the right depicts the phenotype color coding for clusters identified.


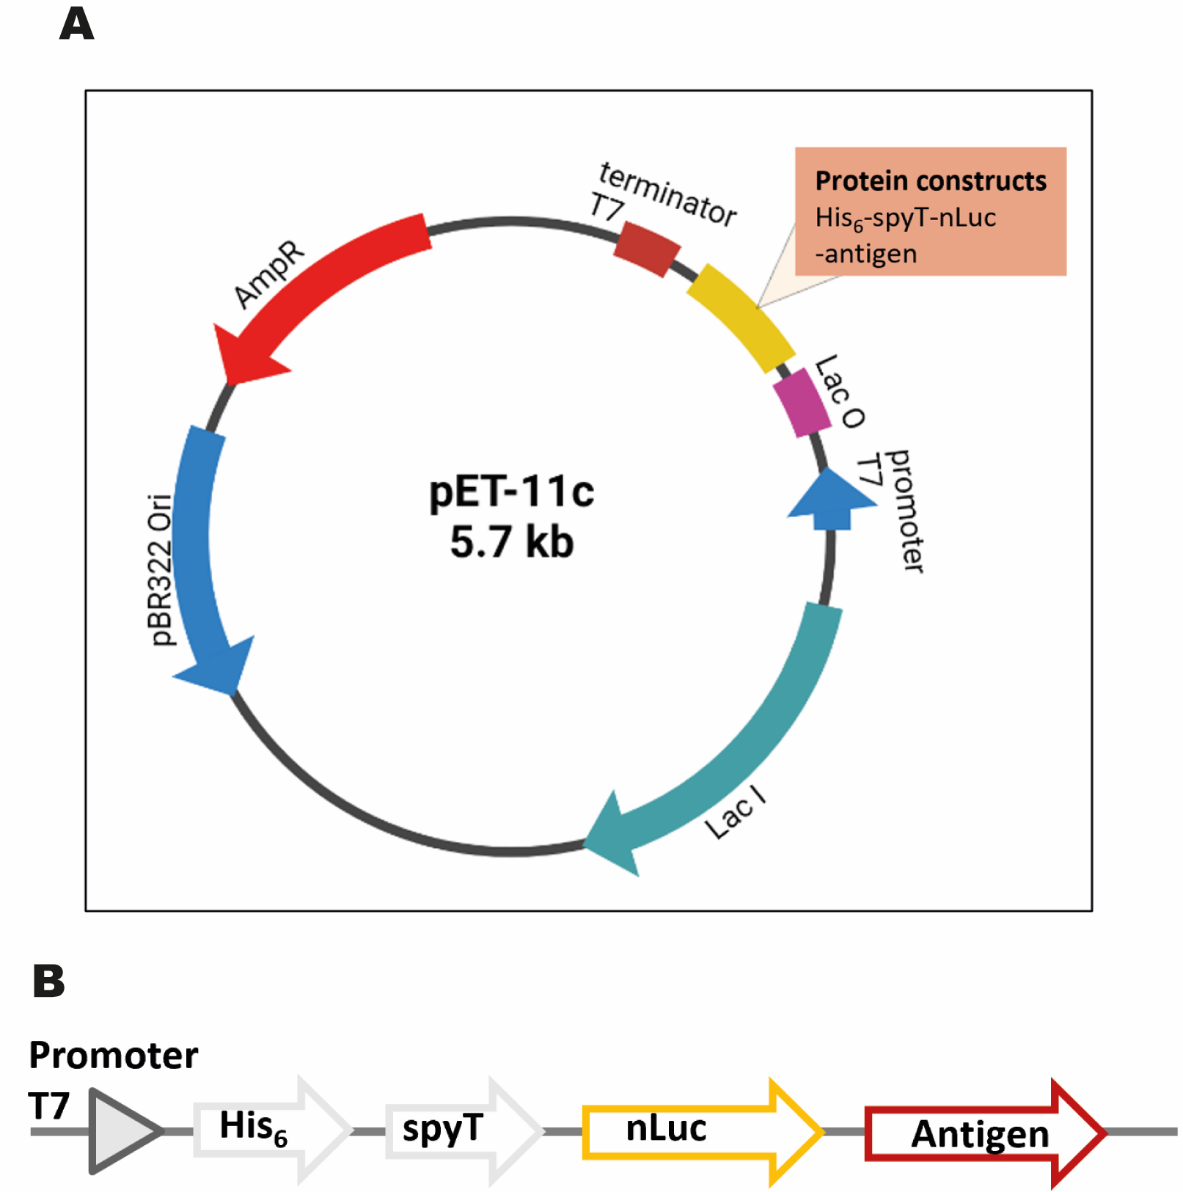


**Fig. S10. Design and graphical representation of the nLuc-fusion construct.** (a) Representative vector map illustrating the design of the nanoluciferase (nLuc)-fusion construct used for antigen display on OMVs. (b) Graphical schematic showing the structure and components of the nLuc-fusion construct.


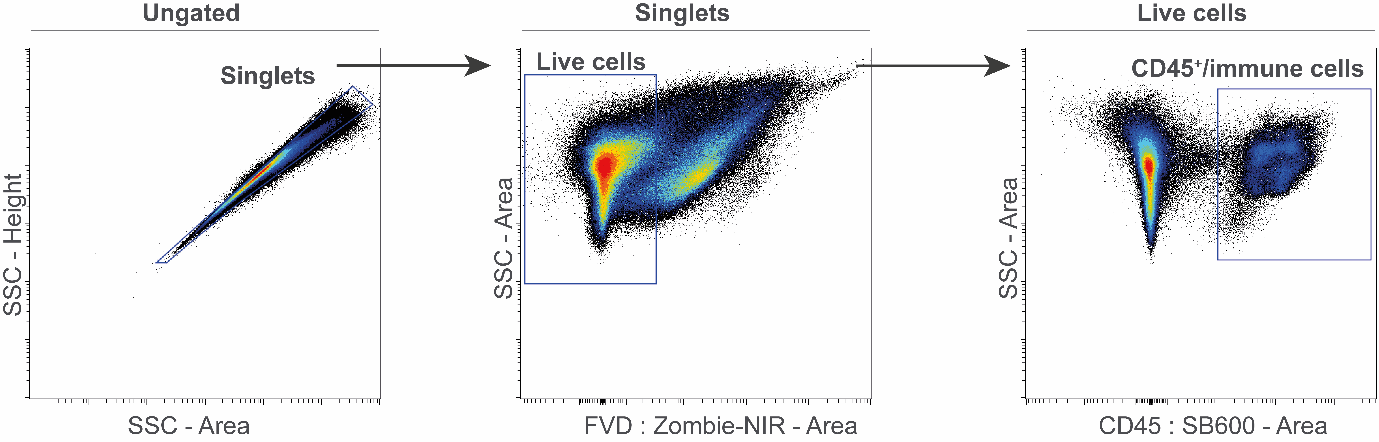


**Figure S11: Gating strategy for spectral flow cytometry analysis.** Doublets were excluded using side scatter height (SSC-H) versus side scatter area (SSC-A) gating. Dead cells were removed by negative selection using fixable viability dye (Zombie NIR). Live single cells were then gated for CD45 expression to identify total immune cells. The resulting CD45⁺ cell population was used for unsupervised analysis, including clustering via FlowSOM and dimensionality reduction using tSNE-CUDA.

**Video S1**: FIB-SEM stack represented as 2D animation.

**TableS1: Details of markers and corresponding fluorochromes used in the spectral flow cytometry panel.** The table lists all markers included in the flow cytometry panel, specifying target cell populations or purposes, antibody clones, conjugated fluorochromes, and manufacturers.

| **Marker** | **Target cells/purpose** | **Clone** | **Fluorochrome** | **Manufacturer** |
| --- | --- | --- | --- | --- |
| CD45 | Immune cells | 30-F11 | SB600 | Invitrogen (TF) |
| CD19 | B-cells | 6D5 | BUV750 | Biolegend |
| CD45R/B220 | B-1 cells | RA1-6B2 | Spark violet 538 | Biolegend |
| IgD | Immature B cells | 11-26c.2a | APC | Biolegend |
| GL7 | GC B cells | GL7 | PE | Biolegend |
| biotin-PNA | GC B cells | x | x | Vectorlabs |
| CD21/35 | Follicular dendritic cells, B cells | 7G6 (RUO) | BUV805 | BD Optibuild |
| CD3 | T cells | 145-2C11 | BV785 | BioLegend |
| CD4 | CD4+ T cells | GK1.5 (RUO) | APC-Cy7 | BD Pharmingen |
| CD8a | CD8+ T cells | QA17A07 | Spark YG 593 | Biolegend |
| CD62L | Naive and effector memory T cells | MEL-14 | BUV395 | BD Horizon |
| CD44 | Naïve and effector memory T cells | IM7 (RUO) | BUV496 | BD Optibuild |
| CD5 | T cell activation marker | 53-7.3 | BUV661 | BD Optibuild |
| CD25 | Treg/T cell activation marker | PC61 (RUO) | BUV737 | BD Horizon |
| CXCR5 | Follicular helper T cells | L138D7 | PerCP5.5 | Biolegend |
| PD1 | T Follicular helper T cells | 29F.1A12 | PE-Fire640 | Biolegend |
| Ox40 | Follicular helper T cells | OX-86 | BV711 | Biolegend |
| CD11b | Myeloid cells | M1/70 (RUO) | PE-Cy7 | BD Pharm. |
| Ly6C | Neutrophils, Monocytes | HK1.4 | BUV615 | BD Optibuild |
| Ly6G | Neutrophils | 1A8 | PE-Fire810 | BioLegend |
| F4/80 | Macrophages | BM8 | BUV563 | Thermoscientific |
| CD11c | Dendritic cells | N418 | Spart Red 718 | Biolegend |
| CD169 | Macrophages (lymphoid tissues) | 3D6.112 | FITC | Biolegend |
| CD80 | Activation marker | 16-10A1 | PE/Cy5 | Biolegend |
| CD86 | Activation marker | GL-1 | PE/Dazzle 594 | Biolegend |
| MHCII | Activation marker | AF6-120.1 (RUO) | BV421 | BD Horizon |
| CD103 | Homing marker, tissue residence | QA17A24 | PerCP/Fire™ 780 | Biolegend |
| PDL1 | Exhaustion marker for myeloid cells | 10F.9G2 | BV650 | Biolegend |
| Streptavidin | for PNA (biotin) | x | PerCP | Biolegend |
| OMVs | Vaccine particles | x | AF647 | Aberabiosciences |
| Fixable viability dye (FVD) | dead cells | x | Zombie NIR | Biolegend |

**TableS2: Amino acid sequences of His₆-tagged nanoluciferase-fused proteins.** The table lists the full amino acid sequences of His₆-tagged nanoluciferase (nLuc) fusion proteins used for OMV surface display, including constructs for SpyTag-nLuc, SpyTag-nLuc-PnrA, and SpyTag-nLuc-AliA, with respective sequence lengths, molecular weights, and isoelectric points.

| Histidine tag  SpyTag  nLuc | >SpT-nLuc-protein (218 aa) 23.79kDa  MGSSHHHHHHSSGLVPRGSHMGVPTIVMVDAYKRYKGSGGSGVFTLEDFVGDWRQTAGYNLDQVLEQGGVSSLFQNLGVSVTPIQRIVLSGENGLKIDIHVIIPYEGLSGDQMGQIEKIFKVVYPVDDHHFKVILHYGTLVIDGVTPNMIDYFGRPYEGIAVFDGKKITVTGTLWNGNKIIDERLINPDGSLLFRVTINGVTGWRLCERILAGSGGTG |
| --- | --- |
| Histidine tag  SpyTag  nLuc  PnrA | >SpT-nLuc-PnrA protein (546 aa) 58.33 kDa pI 5.77  MGSSHHHHHHSSGLVPRGSHMGVPTIVMVDAYKRYKGSGGSGVFTLEDFVGDWRQTAGYNLDQVLEQGGVSSLFQNLGVSVTPIQRIVLSGENGLKIDIHVIIPYEGLSGDQMGQIEKIFKVVYPVDDHHFKVILHYGTLVIDGVTPNMIDYFGRPYEGIAVFDGKKITVTGTLWNGNKIIDERLINPDGSLLFRVTINGVTGWRLCERILAGSGGTGGNRSSRNAASSSDVKTKAAIVTDTGGVDDKSFNQSAWEGLQAWGKEHNLSKDNGFTYFQSTSEADYANNLQQAAGSYNLIFGVGFALNNAVKDAAKEHTDLNYVLIDDVIKDQKNVASVTFADNESGYLAGVAAAKTTKTKQVGFVGGIESEVISRFEAGFKAGVASVDPSIKVQVDYAGSFGDAAKGKTIAAAQYAAGADIVYQVAGGTGAGVFAEAKSLNESRPENEKVWVIGVDRDQEAEGKYTSKDGKESNFVLVSTLKQVGTTVKDISNKAERGEFPGGQVIVYSLKDKGVDLAVTNLSEEGKKAVEDAKAKILDGSVKVPEK |
| Histidine tag  SpyTag  nLuc  AliA | >SpT-nLuc-AliA protein (855 aa) 64.59kDa pI 5.27  MGSSHHHHHHSSGLVPRGSHMGVPTIVMVDAYKRYKGSGGSGVFTLEDFVGDWRQTAGYNLDQVLEQGGVSSLFQNLGVSVTPIQRIVLSGENGLKIDIHVIIPYEGLSGDQMGQIEKIFKVVYPVDDHHFKVILHYGTLVIDGVTPNMIDYFGRPYEGIAVFDGKKITVTGTLWNGNKIIDERLINPDGSLLFRVTINGVTGWRLCERILAGSGGTGSGSGSSTKGEKTFSYIYETDPDNLNYLTTAKAATANITSNVVDGLLENDRYGNFVPSMAEDWSVSKDGLTYTYTIRKDAKWYTSEGEEYAAVKAQDFVTGLKYAADKKSDALYLVQESIKGLDAYVKGEIKDFSQVGIKALDEQTVQYTLNKPESFWNSKTTMGVLAPVNEEFLNSKGDDFAKATDPSSLLYNGPYLLKSIVTKSSVEFAKNPNYWDKDNVHVDKVKLSFWDGQDTSKPAENFKDGSLTAARLYPTSASFAELEKSMKDNIVYTQQDSITYLVGTNIDRQSYKYTSKTSDEQKASTKKALLNKDFRQAIAFGFDRTAYASQLNGQTGASKILRNLFVPPTFVQADGKNFGDMVKEKLVTYGDEWKDVNLADSQDGLYNPEKAKAEFAKAKSALQAEGVQFPIHLDMPVDQTATTKVQRVQSMKQSLEATLGADNVIIDIQQLQKDEVNNITYFAENAAGEDWDLSDNVGWGPDFADPSTYLDIIKPSVGESTKTYLGFDSGEDNVAAKKVGLYDYEKLVTEAGDETTDVAKRYDKYAAAQAWLTDSALIIPTTSRTGRPILSKMVPFTIPFALSGNKGTSEPVLYKYLELQDKAVTVDEYQKAQEKWMKEKEESNKKAQEDLAKHVK |
